# Supplementary material for: Strong donor–acceptor couplings in a special pair-antenna model
Source: Royal Society of Chemistry journal article supplement (doi:10.1039/c0cc03665j), 2010-01-01
Supplement: c0cc03665j.pdf [file c0cc03665j.pdf]

## Supporting information

### Strong Donor-Acceptor Couplings in a Special Pair-Antenna Model

Mikhail Filatov,<sup>a</sup> Frédéric Laquai,<sup>b</sup> Daniel Fortin,<sup>c</sup> Roger Guillard\*<sup>a</sup> and Pierre D. Harvey\*<sup>a,c</sup>

<sup>a</sup> Institut de Chimie Moléculaire de l'Université de Bourgogne (ICMUB), UMR 5260 CNRS, 9 Avenue Alain Savary, BP 47870-21078 Dijon, France. Fax: +33380396117; Tel: +33380396111; E-mail: roger.guillard@u-bourgogne.fr; pierre.harvey@u-bourgogne.fr

<sup>b</sup> Max Planck Research Group for Organic Optoelectronics, Max Planck Institute for Polymer Research, Ackermannweg 10, D-55128 Mainz, Germany. Fax: +49 6131 379 100; Tel: +49 6131 379 135; E-mail: laquai@mpip-mainz.mpg.de

<sup>c</sup> Département de Chimie, Université de Sherbrooke, Sherbrooke, PQ, Canada J1K 2R. Fax 819-821-8017 ; Tel 819-821-7092

#### Contents

|                                    |    |
|------------------------------------|----|
| General procedures .....           | 2  |
| Experimental procedures .....      | 3  |
| NMR and mass spectra .....         | 7  |
| Optical spectra .....              | 23 |
| DFT Calculations .....             | 29 |
| Transient absorption spectra ..... | 30 |
| References .....                   | 32 |

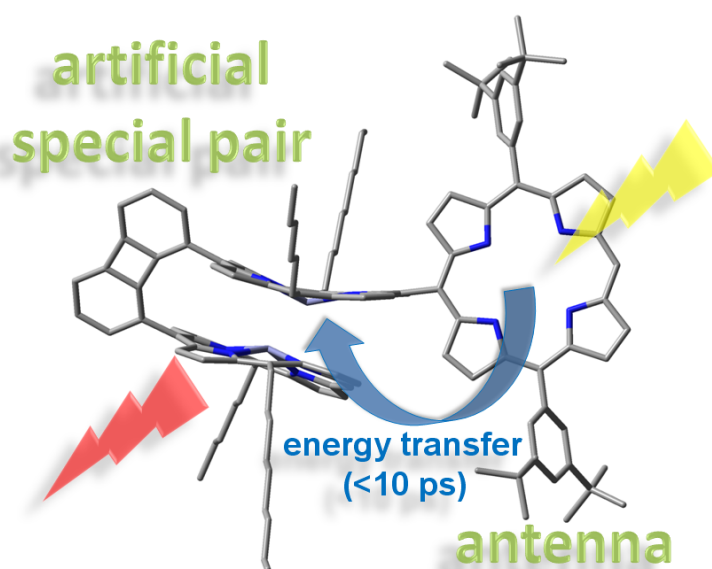

## General procedures

All known compounds (1,8-dibromobiphenylene(**2**)<sup>1,2,3,4</sup>, 5,15-dinonylporphyrin<sup>5</sup>, 5,15-bis(3,5-di-*tert*-butylphenyl)porphyrin<sup>6</sup> and 5-bromo-10,20-bis(3,5-di-*tert*-butylphenyl)porphyrin(**8**)<sup>7,8</sup> were synthesized as previously described.

The handling of all air/water sensitive materials was carried out using standard high vacuum techniques. Dried toluene was obtained by passing through alumina under N<sub>2</sub> in the solvent purification systems and then further dried over activated molecular sieves; extra dry DMF was purchased from Aldrich. Triethylamine and DCM were distilled from CaH<sub>2</sub>; THF was distilled from sodium benzophenone ketyl. Unless specified otherwise all other solvents were used as commercially supplied. Where mixtures of solvents were used, ratios are reported by volume. Column chromatography was carried out on silica gel 60 at normal pressure. Size exclusion chromatography was carried out under gravity using cross-linked polystyrene Bio-Beads® SX-1 (200 – 400 mesh) in DCM.

UV-Vis spectra were recorded in solutions using Varian Cary 50 spectrophotometer (1 cm path length quartz cell). Emission and excitation spectra were measured by using a double monochromator Fluorolog FL-1039 instrument from HORIBA Jobin Yvon, equipped with TCSPC module for time-resolved measurements (interchangeable NanoLED pulsed laser-diodes as sources and TBX-04 photomultiplier tube as a detector were used). Emission quantum yields of the compounds were measured relative to the fluorescence of free-base tetraphenylporphyrin ( $\phi_f=0.11$ )<sup>9</sup> in deoxygenated toluene. Sample concentrations were chosen to obtain an absorbance of 0.03 - 0.07, at least three measurements were performed for each sample. All the measurements were performed using deoxygenated (by Ar bubbling) freshly distilled tetrahydrofuran. Fluorescence lifetimes were obtained by deconvolution and distribution lifetime analysis.

Transient absorption measurements were performed with a home-built pump-probe setup. For measurements in the time range of 1-3 ns with a resolution of ~100 fs the output of a commercial titanium:sapphire amplifier (Coherent LIBRA HE, 3.5 mJ, 1 kHz, 100 fs) was split with one portion used to generate a 400 nm excitation pulse (second harmonic generation in a BBO crystal cut at  $\theta = 29.2^\circ$ ) and another used to generate a white light probe using a home-built two-stage broadband (480-850 nm) non-collinear optical parametric amplifier (NOPA) for white light generation and amplification in the visible spectral range. The variable delay of up to ~3 ns between pump and probe was introduced by a broadband retroreflector mounted on a mechanical delay stage. Only reflective optics were used to guide the probe beam to the sample to minimize chirp. The excitation pulse was chopped at 500 Hz, while the white light pulses were dispersed onto a linear photodiode array which was read out at 1 kHz. Adjacent diode readings corresponding to the transmission of the sample after an excitation pulse and without an excitation pulse were used to calculate  $\Delta T/T$ .

NMR spectra were recorded at room temperature using Bruker Avance 300 and Bruker Avance II 600 instruments with the chemical shifts reported as  $\delta$  in ppm and coupling constants expressed in Hz. Accurate mass measurements (HRMS) were carried out using a Bruker microTOF-Q™ ESI-TOF mass spectrometer. MALDI-TOF mass spectrometry was carried out with a Bruker Ultraflex II MALDI-TOF mass spectrometer using dithranol as the matrix.

The electronic structure optimizations were calculated with the Gaussian 09(3) software, at the Université de Sherbrooke's Mammouth super computer, supported by the Réseau Québécois de Calcul de Haute Performance. The DFT(4-7) was calculated by the B3LYP(8-10) method with 3-21G\* basis sets on all atoms(11-16). The TD-DFT(17-19) was calculated with the same method, but in this case a THF solvent model was also added(20). The UV-Vis spectrum was produced with the Gausssum software(24) with full-width at halfmaximum (fwhm) of 1000 cm<sup>-1</sup>.<sup>10,11,12,13</sup>

## Experimental procedures

### Zinc(II) 5-(4,4,5,5-tetramethyl-1,3,2-dioxaborolan-2-yl)-10,20-dinonylporphyrin (3)

The solution of N-bromosuccinimide (0.044 g, 0.249 mmol) in chloroform (50 mL) was added to the solution of 5,15-dinonylporphyrin (0.14 g, 0.249 mmol) in chloroform (500 mL) at room temperature during a period of 5 min and the resulting mixture was stirred for 20 min before the reaction was quenched with acetone and solvent evaporated to dryness. The residue was dissolved in THF (100 mL), Zn(OAc)<sub>2</sub>·2H<sub>2</sub>O (0.545 g, 2.49 mmol) was added and the mixture was heated at reflux for 20 min. After cooling to room temperature water (100 mL) was added, the precipitate formed was filtered, washed at the filter with MeOH (200 mL) and dried in vacuum. The resulting solid material was mixed with PdCl<sub>2</sub>(PPh<sub>3</sub>)<sub>2</sub> (0.009 g, 0.0078 mmol) and 4,4,5,5-tetramethyl-1,3,2-dioxaborolane (0.228 g, 32 mmol) in anhydrous 1,2-dichloroethane (10 mL) and distilled Et<sub>3</sub>N (0.5 mL). The resulting mixture was heated at reflux 40 min under Ar. Allowed to cool, the mixture was diluted with dichloromethane, washed with water (1x20 mL), brine (1x20 mL), dried under Na<sub>2</sub>SO<sub>4</sub> and evaporated in vacuum. Crude product was purified by column chromatography on silica gel, using hexanes-dichloromethane (1:1) as an eluent. Purple crystalline solid (0.120 g, 64% yield), m.p. > 300°C. **UV/vis** (THF) λ<sub>max</sub> (log ε) 396 (4.64), 416 (5.69), 549 (4.17). **<sup>1</sup>H NMR** (300 MHz, CD<sub>2</sub>Cl<sub>2</sub>, 25°C): δ 9.88 (d, *J* = 4.8 Hz, 2H), 9.74 (s, 1H), 9.58 (d, *J* = 4.8 Hz, 2H), 9.37 (d, *J* = 4.6 Hz, 2H), 9.14 (d, *J* = 4.6 Hz, 2H), 4.87-4.78 (m, 4H), 2.55-2.42 (m, 4H), 1.93 (s, 12H), 1.90-1.77 (m, 4H), 1.62-1.49 (m, 4H), 1.47-1.26 (m, 16H), 0.94-0.86 (m, 6H). **<sup>13</sup>C NMR** (75 MHz, CD<sub>2</sub>Cl<sub>2</sub>, 25°C) δ 153.12, 150.36, 149.97, 148.03, 133.41, 132.03, 129.65, 128.83, 120.27, 106.17, 85.75, 39.58, 35.84, 32.53, 31.27, 30.32, 30.01, 25.84, 23.29, 14.47. **ESI HRMS** *m/z* 749.40949; calcd for C<sub>44</sub>H<sub>59</sub>BN<sub>4</sub>O<sub>2</sub>Zn (MH<sup>+</sup>) 749.40534.

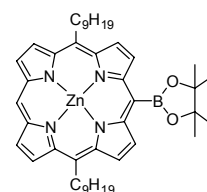

### Zinc(II) 5-{8-[zinc(II)-10,20-dinonylporphyrin-5-yl]-biphenylene-1-yl}-10,20-dinonylporphyrin (4)

5-(4,4,5,5-Tetramethyl-1,3,2-dioxaborolan-2-yl)-10,20-dinonylporphyrin zinc(II) (0.05 g, 0.0665 mmol), 1,8-dibromobiphenylene (0.01 g, 0.0332 mmol), Cs<sub>2</sub>CO<sub>3</sub> (0.043 g, 0.133 mmol), and Pd(PPh<sub>3</sub>)<sub>4</sub> (0.0076 g, 0.0066 mmol) were dissolved in a mixture of dry DMF (2 mL) and dry toluene (4 mL). The solution was deoxygenated via bubbling Ar for 10 min and the resulting mixture was heated at 90 °C for 24 h under Ar. Allowed to cool, the mixture was quenched with water and extracted with CH<sub>2</sub>Cl<sub>2</sub>. The organic layer was dried over anhydrous Na<sub>2</sub>SO<sub>4</sub> and evaporated. Purification by column chromatography on silica gel, using hexanes-dichloromethane (2.5:1) supplied **4** as a brown crystalline solid (0.028 g, 60% yield), m.p. > 300°C. **UV/vis** (THF) λ<sub>max</sub> (log ε) 406 (5.53), 450 (4.28), 560 (4.05), 599 (3.64). **<sup>1</sup>H NMR** (300 MHz, d<sup>8</sup>-THF, 25°C): δ 9.25 (d, *J* = 5.9 Hz, 2H), 8.80 (d, *J* = 4.4 Hz, 4H), 8.65 (d, *J* = 4.6 Hz, 4H), 8.52 (d, *J* = 4.4 Hz, 4H), 8.25 (d, *J* = 4.6 Hz, 2H), 7.29-7.06 (m, 6H), 3.71-3.59 (m, 8H), 2.04-1.91 (m, 8H), 1.63-1.48 (m, 8H), 1.46-1.24 (m, 40H), 0.96-0.85 (m, 12H). **<sup>13</sup>C NMR** (75 MHz, d<sup>8</sup>-THF, 25°C): δ 155.43, 151.63, 149.08, 148.61, 148.27, 147.58, 137.40, 135.93, 131.21, 130.70, 127.72, 127.01, 126.90, 118.18, 116.61, 114.43, 104.70, 39.93, 35.30, 33.08, 31.57, 30.91, 23.76, 14.64. **ESI HRMS** *m/z* 1396.6560; calcd for C<sub>88</sub>H<sub>100</sub>N<sub>4</sub>Zn<sub>2</sub> (M<sup>+</sup>) 1396.6648.

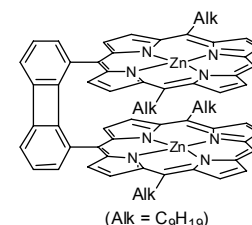

### Zinc(II) 5-(8-Bromobiphenylene-1-yl)-10,20-dinonylporphyrin (5)

5-(4,4,5,5-Tetramethyl-1,3,2-dioxaborolan-2-yl)-10,20-dinonylporphyrin zinc(II) **3** (0.14 g, 0.186 mmol), 1,8-dibromobiphenylene (0.115 g, 0.372 mmol), Cs<sub>2</sub>CO<sub>3</sub> (0.091 g, 0.28 mmol), and Pd(PPh<sub>3</sub>)<sub>4</sub> (0.021 g, 0.0182 mmol) were dissolved in a mixture of dry DMF (4 mL) and dry toluene (8 mL). The solution was deoxygenated via bubbling Ar for 10 min and the resulting mixture was heated at 90 °C for 15 h under Ar. Allowed to cool, the mixture was quenched with water and extracted with CH<sub>2</sub>Cl<sub>2</sub>. The organic

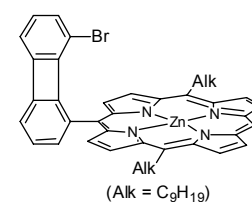

layer was dried over anhydrous  $\text{Na}_2\text{SO}_4$  and evaporated. Purification by column chromatography on silica gel, using hexanes-dichloromethane (3:1) supplied **5** as a purple crystalline solid (0.149 g, 94% yield), m.p. > 300°C. **UV/vis** (THF)  $\lambda_{\text{max}}$  (log  $\epsilon$ ) 422 (5.43), 554 (4.10), 598 (3.47).  **$^1\text{H}$  NMR** (300 MHz,  $\text{CD}_2\text{Cl}_2$ , 25°C):  $\delta$  9.56 (s, 1H), 9.44 (d,  $J = 4.8$  Hz, 2H), 9.24 (d,  $J = 4.5$  Hz, 2H), 9.19 (d,  $J = 4.7$  Hz, 2H), 8.97 (d,  $J = 4.6$  Hz, 2H), 7.66 (d,  $J = 8.2$  Hz, 1H), 7.23-7.15 (m, 1H), 7.03 (d,  $J = 6.9$  Hz, 1H), 6.66 (d,  $J = 6.7$  Hz, 1H), 6.43 (dd,  $J_1 = 8.5$  Hz,  $J_2 = 6.8$  Hz, 1H), 6.19 (d,  $J = 8.6$  Hz, 1H), 4.75-4.65 (m, 4H), 2.44-2.30 (m, 4H), 1.76-1.64 (m, 4H), 1.48-1.36 (m, 4H), 1.31-1.11 (m, 16H), 0.83-0.73 (m, 6H).  **$^{13}\text{C}$  NMR** (75 MHz,  $\text{CD}_2\text{Cl}_2$ , 25°C):  $\delta$  136.36, 134.48, 132.26, 132.11, 132.06, 130.55, 129.65, 129.46, 127.95, 120.79, 117.46, 116.73, 116.09, 110.73, 105.21, 39.65, 35.92, 32.52, 31.25, 30.34, 30.31, 29.99, 23.28, 14.47. **ESI HRMS**  $m/z$  852.28104; calcd for  $\text{C}_{50}\text{H}_{53}\text{BrN}_4\text{Zn}$  ( $\text{M}^+$ ) 852.27396.

### Zinc(II) 5,15-di-(4,4,5,5-tetramethyl-1,3,2-dioxaborolan-2-yl)-10,20-dinonylporphyrin (**6**)

Obtained by the procedure described for **3**. Purple microcrystalline solid (72%), m.p. > 300°C. **UV/vis** (THF)  $\lambda_{\text{max}}$  (log  $\epsilon$ ) 400 (4.60), 420 (5.62), 534 (4.08), 573 (3.75), 602 (3.75).  **$^1\text{H}$  NMR** (300 MHz,  $\text{CD}_2\text{Cl}_2$ , 25°C):  $\delta$  9.93 (d,  $J = 4.8$  Hz, 4H), 9.70 (d,  $J = 4.8$  Hz, 4H), 5.15-5.01 (m, 4H), 2.65-2.50 (m, 4H), 1.92-1.79 (m, 28H), 1.64-1.49 (m, 4H), 1.43-1.26 (m, 16H), 0.95-0.83 (m, 6H).  **$^{13}\text{C}$  NMR** (75 MHz,  $\text{CD}_2\text{Cl}_2$ , 25°C):  $\delta$  152.83, 150.70, 133.85, 129.66, 120.97, 85.83, 39.65, 36.29, 32.50, 31.23, 30.36, 30.28, 29.98, 25.76, 23.27, 14.45. **ESI HRMS**  $m/z$  875.48706; calcd for  $\text{C}_{50}\text{H}_{70}\text{B}_2\text{N}_4\text{O}_4\text{Zn}$  ( $\text{M}^+$ ) 875.49100.

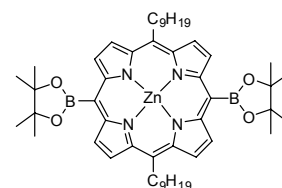

### Zinc(II) 5-{8-[zinc(II)-10,20-dinonylporphyrin-5-yl]-biphenylene-1-yl}-15-(4,4,5,5-tetramethyl-1,3,2-dioxaborolan-2-yl)-10,20-dinonylporphyrin (**7**)

Porphyrin **5** (0.07 g, 0.0818 mmol), 5,15-di-(4,4,5,5-tetramethyl-1,3,2-dioxaborolan-2-yl)-10,20-dinonylporphyrin zinc (II) **6** (0.08 g, 0.0911 mmol),  $\text{Ba}(\text{OH})_2 \cdot 8\text{H}_2\text{O}$  (0.005 g, 0.0158 mmol), and  $\text{Pd}(\text{PPh}_3)_4$  (0.002 g, 0.0017 mmol) were dissolved in dry DMF (5 mL). The solution was deoxygenated via bubbling Ar for 10 min and the resulting mixture was heated at 100 °C for 24 h under Ar. Allowed to cool, the mixture was quenched with water and extracted with  $\text{CH}_2\text{Cl}_2$ . The organic layer was dried over anhydrous  $\text{Na}_2\text{SO}_4$  and evaporated. Purification by column chromatography on silica gel, using hexanes-dichloromethane (content of  $\text{CH}_2\text{Cl}_2$  was gradually increased from 30 to 50 vol%), supplied **7** as a purple crystalline solid (0.06 g, 48% yield), m.p. > 300°C. **UV/vis** (THF)  $\lambda_{\text{max}}$  (log  $\epsilon$ ) 407 (5.56), 561 (4.04), 602 (3.73).  **$^1\text{H}$  NMR** (300 MHz,  $\text{CD}_2\text{Cl}_2$ , 25°C):  $\delta$  9.42 (d,  $J = 4.7$  Hz, 2H), 9.23 (s, 1H), 8.84 (d,  $J = 4.7$  Hz, 2H), 8.80 (d,  $J = 4.5$  Hz, 2H), 8.71 (dd,  $J_1 = 4.7$  Hz,  $J_2 = 2.9$  Hz, 4H), 8.58 (t,  $J = 4.7$  Hz, 2H), 7.36-7.10 (m, 6H), 4.00-3.78 (m, 8H), 2.14 (s, 12H), 2.07-1.93 (m, 8H), 1.72-1.59 (m, 8H), 1.52-1.24 (m, 40H), 0.94-0.85 (12H).  **$^{13}\text{C}$  NMR** (75 MHz,  $\text{CD}_2\text{Cl}_2$ , 25°C):  $\delta$  155.52, 154.84, 151.91, 151.14, 151.11, 148.51, 148.41, 148.29, 148.25, 147.48, 146.81, 146.37, 136.50, 136.00, 134.42, 134.09, 132.62, 131.59, 130.98, 130.82, 127.94, 127.39, 127.29, 127.23, 126.73, 118.87, 118.61, 116.80, 115.68, 114.78, 104.96, 85.57, 39.26, 35.60, 35.48, 32.53, 31.24, 30.24, 30.01, 26.06, 23.30, 14.48. **ESI HRMS**  $m/z$  1521.7373; calcd for  $\text{C}_{94}\text{H}_{111}\text{BN}_8\text{O}_2\text{Zn}_2$  ( $\text{M}^+$ ) 1521.7537.

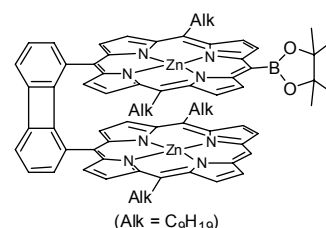

### Zinc(II) 5-[10,20-Bis-(3,5-di-tert-butylphenyl)porphyrin-5-yl]-15-(4,4,5,5-tetramethyl-1,3,2-dioxaborolan-2-yl)-10,20-dinonylporphyrin (**9**)

5-Bromo-10,20-bis(3,5-di-tert-butylphenyl)porphyrin (0.05 g, 0.0654 mmol), 5,15-di-(4,4,5,5-tetramethyl-1,3,2-dioxaborolan-2-yl)-10,20-dinonylporphyrin zinc (II) (0.065 g, 0.0741 mmol),  $\text{Cs}_2\text{CO}_3$  (0.042 g, 0.129 mmol), and  $\text{Pd}(\text{PPh}_3)_4$  (0.0075 g, 0.0157 mmol) were dissolved in a mixture of dry DMF (2 mL) and dry toluene (4 mL). The solution was deoxygenated via bubbling Ar for 10 min and the resulting mixture

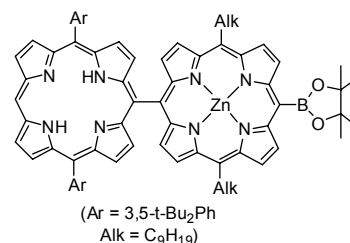

was heated at 90 °C for 16 h under Ar. Allowed to cool, the mixture was quenched with water and extracted with CH<sub>2</sub>Cl<sub>2</sub>. The organic layer was dried over anhydrous Na<sub>2</sub>SO<sub>4</sub> and evaporated. Purification by column chromatography on silica gel, using hexanes-dichloromethane (2:1) supplied **9** as a brown crystalline solid (0.06 g, 64% yield), m.p. > 300°C. **UV/vis** (THF)  $\lambda_{\max}$  (log  $\epsilon$ ) 416 (5.64), 449 (5.45), 513 (4.81), 563 (4.77), 594 (4.42), 609 (4.34). **<sup>1</sup>H NMR** (300 MHz, d<sup>8</sup>-THF, 25°C):  $\delta$  10.43 (s, 1H), 10.00 (d,  $J$  = 4.8 Hz, 2H), 9.69 (d,  $J$  = 4.8 Hz, 2H), 9.48 (d,  $J$  = 4.7 Hz, 2H), 9.25 (d,  $J$  = 4.7 Hz, 2H), 9.02 (d,  $J$  = 4.6 Hz, 2H), 8.57 (d,  $J$  = 4.8 Hz, 2H), 8.18 (d,  $J$  = 1.8 Hz, 4H), 8.02 (dd,  $J_1$  = 4.8 Hz,  $J_2$  = 2.5 Hz, 4H), 7.82 (t,  $J$  = 1.8 Hz, 2H), 5.11-5.00 (m, 4H), 2.62-2.51 (m, 4H), 1.92 (s, 12H), 1.87-1.76 (m, 4H), 1.48 (s, 36H), 1.38-1.20 (m, 20H), 0.84-0.77 (m, 6H). **<sup>13</sup>C NMR** (75 MHz, d<sup>8</sup>-THF, 25°C):  $\delta$  154.64, 154.50, 151.53, 150.92, 149.98, 142.25, 134.97, 134.36, 130.97, 130.66, 129.66, 128.95, 122.49, 122.09, 121.66, 121.03, 119.85, 106.22, 85.73, 40.39, 36.56, 35.85, 32.96, 32.14, 31.62, 30.93, 30.80, 30.47, 23.66, 14.54. **ESI HRMS**  $m/z$  1434.8189; calcd for C<sub>92</sub>H<sub>111</sub>BN<sub>8</sub>O<sub>2</sub>Zn (M<sup>+</sup>) 1434.8324.

**Zinc(II) 5-{8-[zinc(II)-10,20-dinonylporphyrin-5-yl]-biphenylene-1-yl}-[10,20-bis-(3,5-di-tert-butyl-phenyl)-porphyrin-5-yl]-10,20-dinonylporphyrin (1)**

Porphyrin **7** (0.042 g, 0.0275 mmol), 5-bromo-10,20-bis(3,5-di-tert-butylphenyl)porphyrin (0.0105 g, 0.0137 mmol), Cs<sub>2</sub>CO<sub>3</sub> (0.018 g, 0.0552 mmol) and Pd(PPh<sub>3</sub>)<sub>4</sub> (0.003 g, 0.0026 mmol) were dissolved in a mixture of dry DMF (2 mL) and dry toluene (4 mL). The solution was deoxygenated by bubbling Ar for 10 min and the resulting mixture was heated at 100 °C for 7 h under Ar. Allowed to cool, the mixture was quenched with water and extracted with CH<sub>2</sub>Cl<sub>2</sub>. Separation of the target product from starting materials and by-products was performed by column chromatography on silica gel, using hexanes-dichloromethane (1:3), followed by preparative size exclusion chromatography (BioRad Bio-Beads SX-1 packed in CH<sub>2</sub>Cl<sub>2</sub> in a 4 × 50 cm gravity-flow column; flow rate 4 mL min<sup>-1</sup>). Brown crystalline solid (0.014 g, 50% yield), m.p. > 300°C. **UV/vis** (THF)  $\lambda_{\max}$  (log  $\epsilon$ ) 414 (5.61), 421 (5.60), 514 (4.59), 557 (4.37), 591 (4.32), 648 (3.85). **<sup>1</sup>H NMR** (300 MHz, CD<sub>2</sub>Cl<sub>2</sub>, 25°C):  $\delta$  10.69 (d,  $J$  = 4.7 Hz, 1H), 10.41 (s, 1H), 9.74 (d,  $J$  = 4.7 Hz, 1H), 9.59 (d,  $J$  = 4.8 Hz, 1H), 9.43 (d,  $J$  = 4.6 Hz, 1H), 9.32 (d,  $J$  = 4.8 Hz, 1H), 9.26 (d,  $J$  = 4.7 Hz, 2H), 9.18 (s, 1H), 8.97 (d,  $J$  = 4.6 Hz, 1H), 8.84 (d,  $J$  = 4.8 Hz, 2H), 8.80 (d,  $J$  = 4.5 Hz, 2H), 8.67 (d,  $J$  = 4.5 Hz, 2H), 8.58 (d,  $J$  = 1.8 Hz, 2H), 8.53 (d,  $J$  = 4.8 Hz, 2H), 8.39 (d,  $J$  = 4.7 Hz, 2H), 8.05 (t,  $J$  = 1.8 Hz, 1H), 7.98 (d,  $J$  = 4.5 Hz, 2H), 7.95-7.89 (m, 2H), 7.84-7.79 (m, 4H), 7.58-7.40 (m, 3H), 7.23 (d,  $J$  = 6.4 Hz, 1H), 6.93 (dd,  $J_1$  = 8.2 Hz,  $J_2$  = 6.8 Hz, 1H), 6.54 (d,  $J$  = 7.9 Hz, 1H), 6.06 (d,  $J$  = 5.0 Hz, 1H), 3.97-3.70 (m, 4H), 3.61-3.40 (m, 2H), 3.29-3.09 (m, 2H), 2.09-1.83 (m, 8H), 1.75 (s, 18H), 1.70-1.55 (m, 8H), 1.53 (s, 18H), 1.48-1.20 (m, 42H), 0.90-0.79 (m, 12H), -2.32 (br. s, 2H). **ESI HRMS**  $m/z$  2104.0605; calcd for C<sub>136</sub>H<sub>152</sub>N<sub>12</sub>Zn<sub>2</sub> (M+Na<sup>+</sup>) 2104.0738.

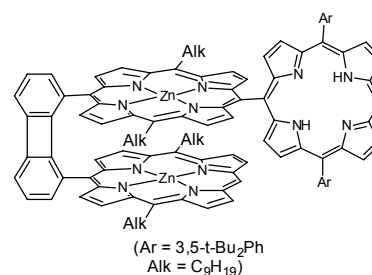

**Zinc(II) 5-{8-[zinc(II)-10,20-dinonylporphyrin-5-yl]-biphenylene-1-yl}-[zinc(II)-10,20-bis-(3,5-di-tert-butyl-phenyl)-porphyrin-5-yl]-10,20-dinonylporphyrin (1-Zn)**

Porphyrin **1** (0.005 g, 0.0024 mmol) was dissolved in chloroform (4 mL) and the solution of Zn(OAc)<sub>2</sub>·2H<sub>2</sub>O (0.052 g, 0.24 mmol) in methanol (1 mL) was added under stirring. The mixture was stirred for 20 min at room temperature under Ar. Then the mixture was washed with water (1x10 mL), brine (1x10 mL), dried under Na<sub>2</sub>SO<sub>4</sub> and evaporated in vacuum. The residue was dissolved in dichloromethane and filtered through a pad of silica gel (2x3 cm). Filtrate was evaporated to give the product as a brown crystalline solid (0.005 g, 97% yield), m.p. > 300°C. **UV/vis** (THF)  $\lambda_{\max}$  (log  $\epsilon$ ) 417 (5.51), 556 (4.56), 590 (4.31), 632 (3.88). **<sup>1</sup>H NMR** (300 MHz, CD<sub>2</sub>Cl<sub>2</sub>, 25°C):  $\delta$  10.78 (d,  $J$  = 4.6 Hz, 1H), 10.45 (s, 1H), 9.82 (d,  $J$  = 4.6 Hz, 1H), 9.64 (d,  $J$  = 4.7 Hz, 1H), 9.49 (d,  $J$  = 4.5 Hz, 1H), 9.38 (d,  $J$  = 4.6 Hz, 1H), 9.27 (d,  $J$  = 4.7

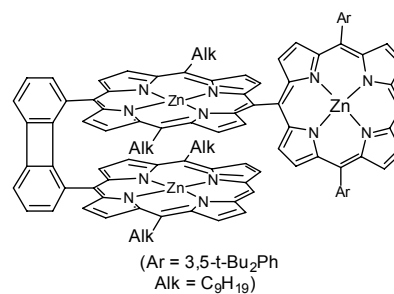

Hz, 2H), 9.19 (s, 1H), 9.04 (d,  $J = 4.5$  Hz, 1H), 8.85 (d,  $J = 4.7$  Hz, 2H), 8.80 (d,  $J = 4.5$  Hz, 2H), 8.67 (d,  $J = 4.5$  Hz, 2H), 8.57 (d,  $J = 1.8$  Hz, 2H), 8.52 (d,  $J = 4.7$  Hz, 2H), 8.39 (d,  $J = 4.7$  Hz, 2H), 8.04 (t,  $J = 1.8$  Hz, 1H), 8.01 (d,  $J = 4.8$  Hz, 1H), 7.98 (d,  $J = 4.6$  Hz, 2H), 7.92 (dd,  $J_1 = 7.8$  Hz,  $J_2 = 1.0$  Hz, 1H), 7.82 (d,  $J = 1.9$  Hz, 2H), 7.79 (d,  $J = 4.7$  Hz, 2H), 7.54 (t,  $J = 1.8$  Hz, 1H), 7.45 (m, 2H), 7.22 (d,  $J = 6.4$  Hz, 1H), 6.92 (dd,  $J_1 = 8.2$  Hz,  $J_2 = 6.8$  Hz, 1H), 6.54 (d,  $J = 7.9$  Hz, 1H), 6.13 (d,  $J = 4.8$  Hz, 1H), 3.97-3.70 (m, 4H), 3.60-3.42 (m, 2H), 3.29-3.11 (m, 2H), 2.1-1.84 (m, 8H), 1.75 (s, 18H), 1.68-1.54 (m, 8H), 1.51 (s, 18H), 1.47-1.18 (m, 42H), 0.89-0.80 (m, 12H). **ESI HRMS**  $m/z$  1071.4910; calcd for  $C_{136}H_{150}N_{12}Zn_3$  ( $M^{2+}$ ) 1071.4985.

## NMR and mass spectra

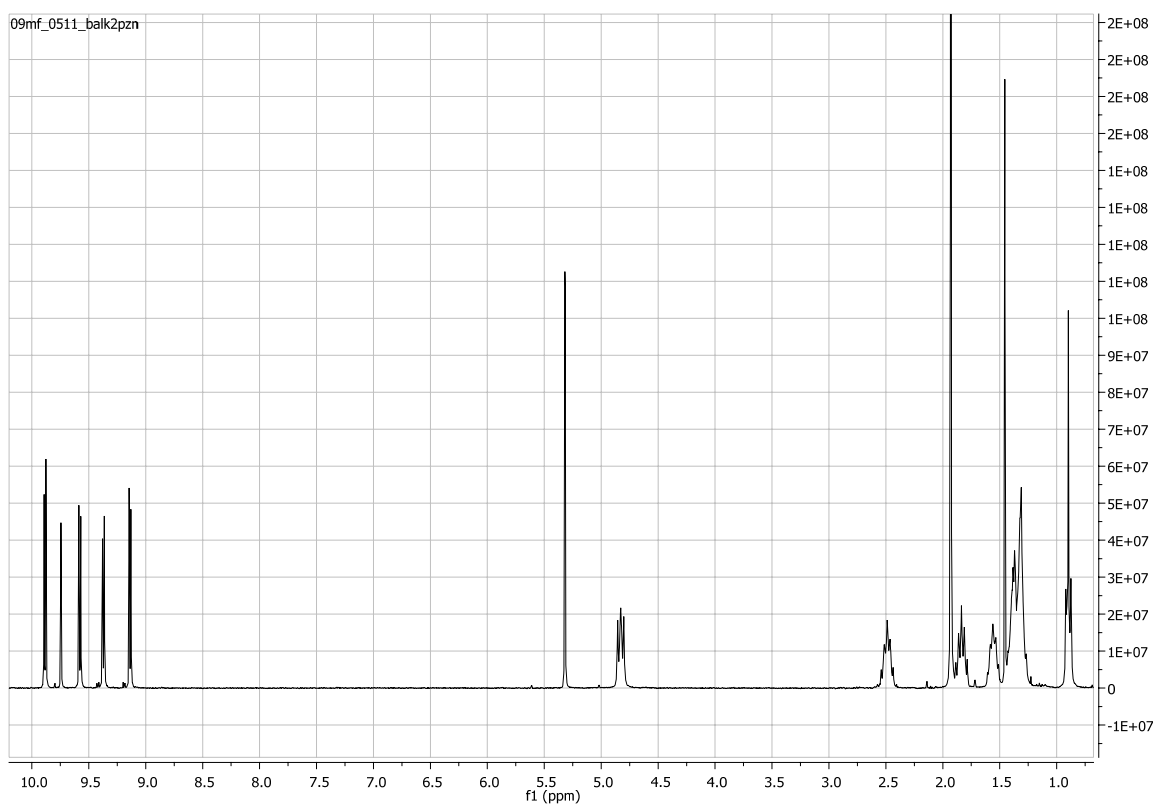

Figure S1.  $^1\text{H}$  NMR spectrum of **3** (300 MHz,  $\text{CD}_2\text{Cl}_2$ , 298 K).

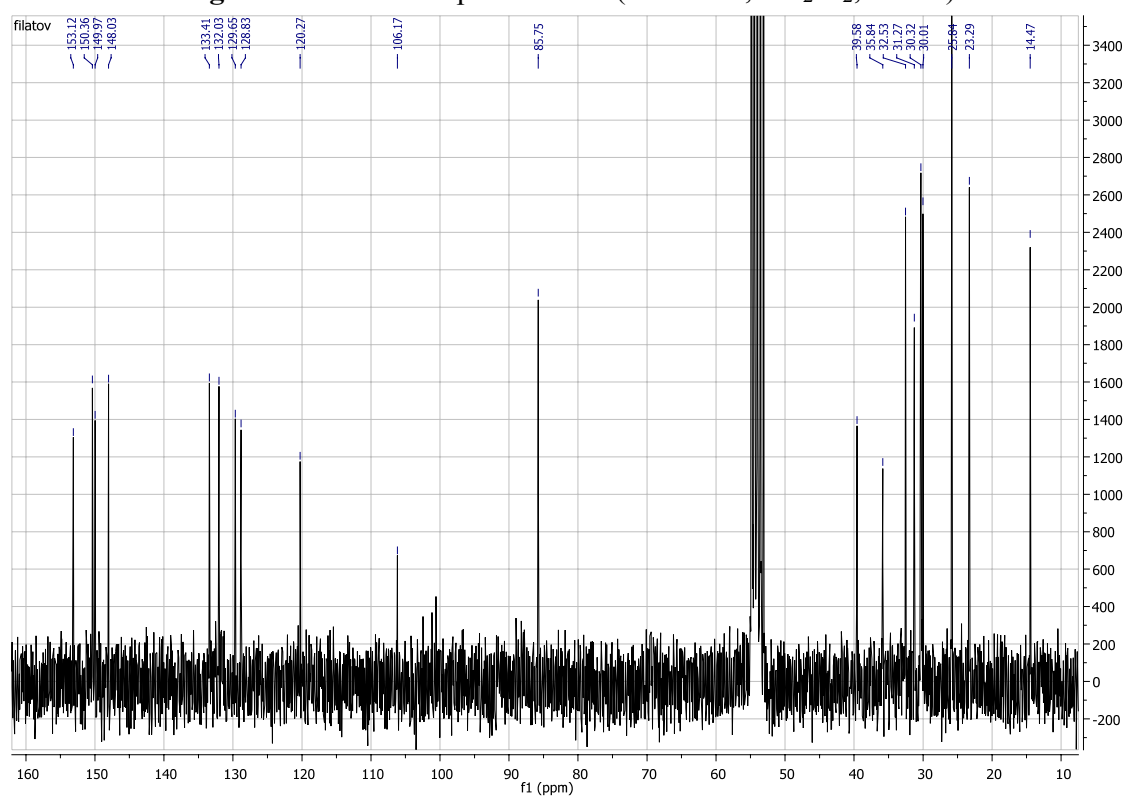

Figure S2.  $^{13}\text{C}$  NMR spectrum of **3** (75 MHz,  $\text{CDCl}_3/\text{TFA}$ , 298 K).

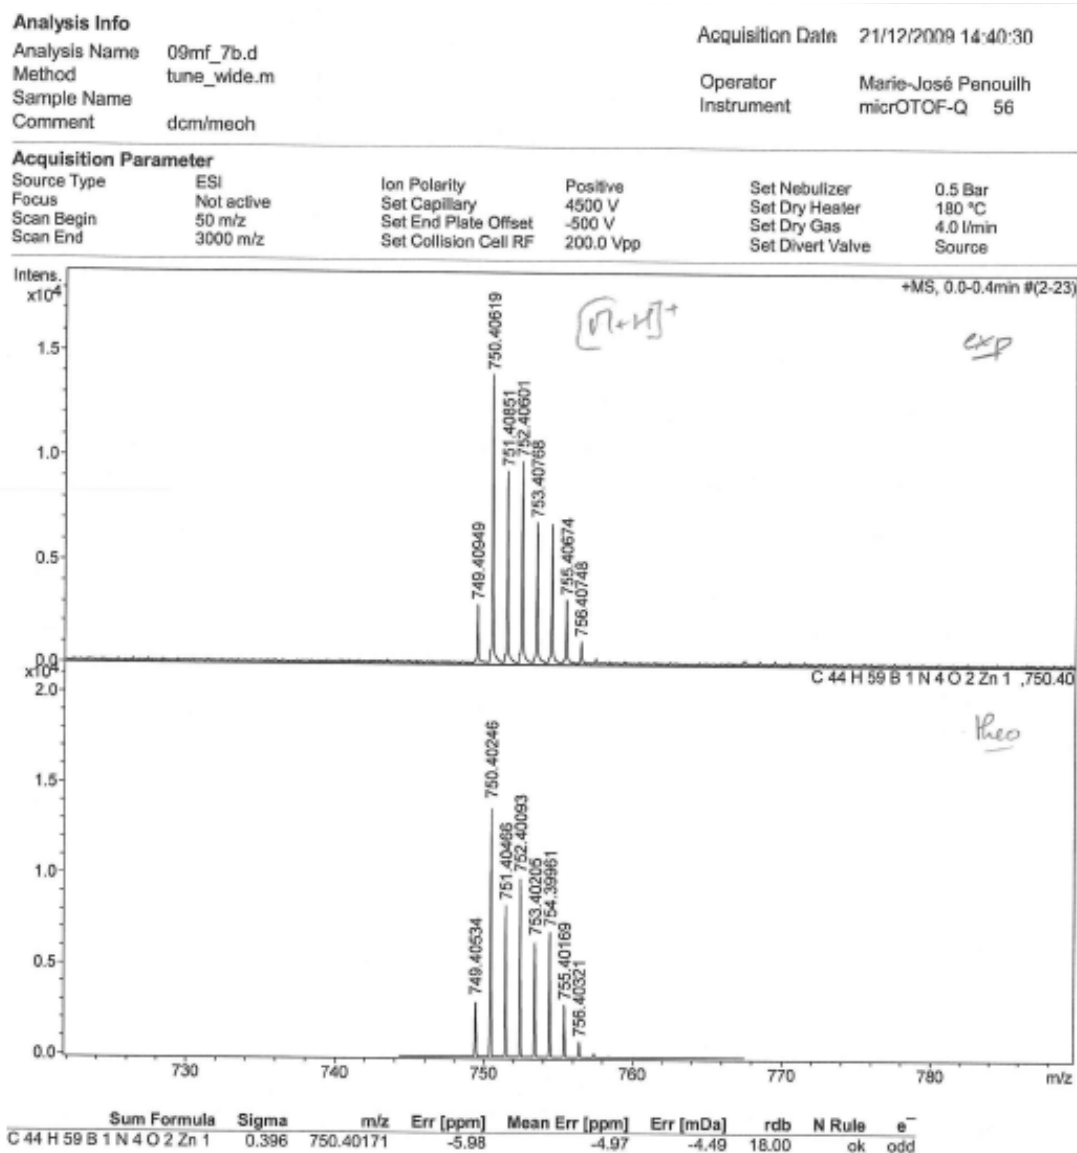

Figure S3. ESI HRMS spectrum of **3** (positive mode).



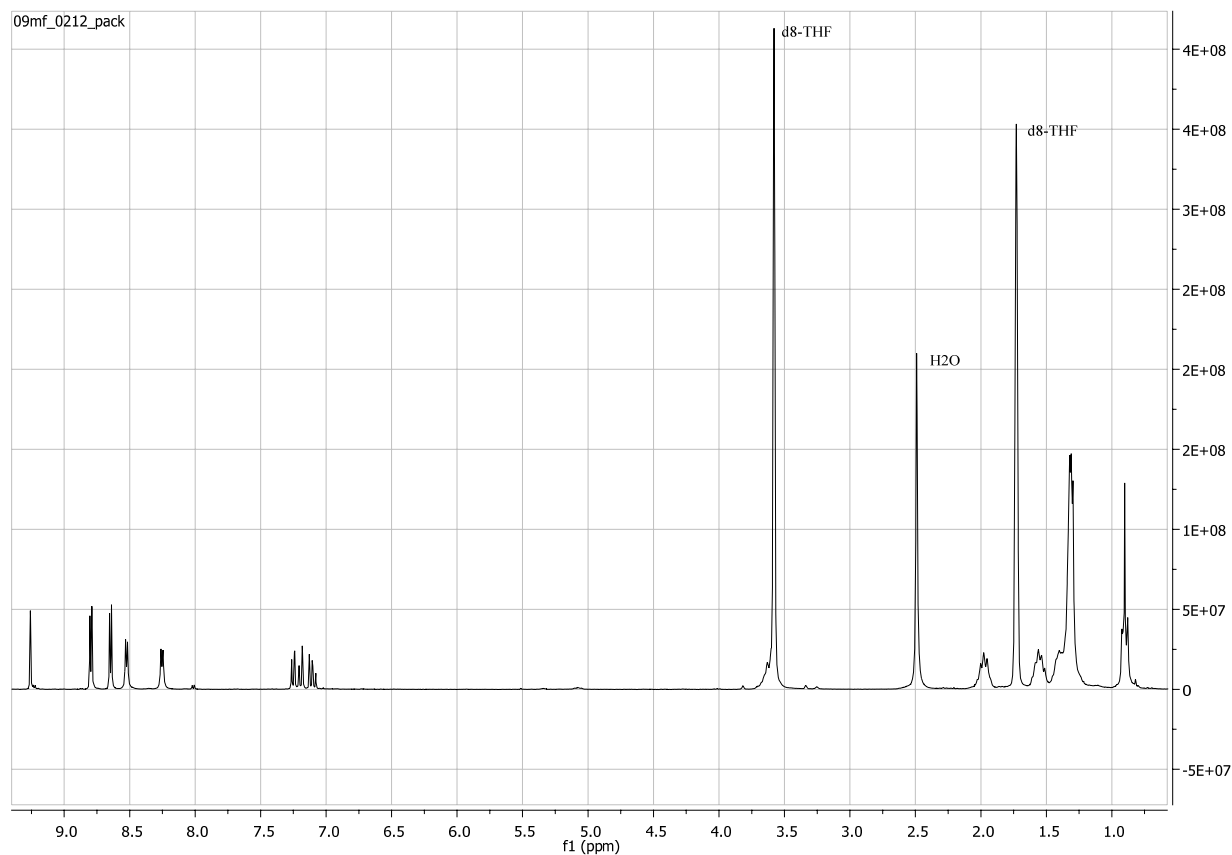

**Figure S4.**  $^1\text{H}$  NMR spectrum of **4** (300 MHz,  $\text{CD}_2\text{Cl}_2$ , 298 K).

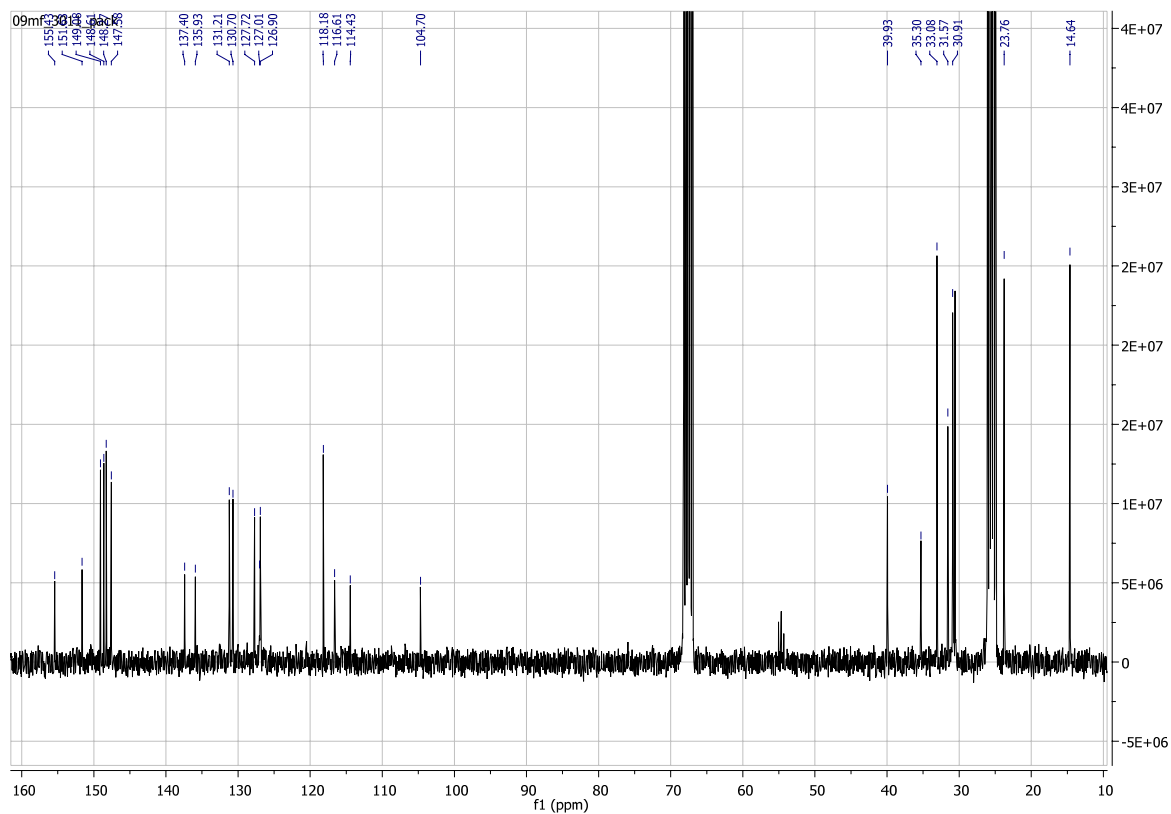

**Figure S5.**  $^{13}\text{C}$  NMR spectrum of **4** (300 MHz,  $\text{CD}_2\text{Cl}_2$ , 298 K).

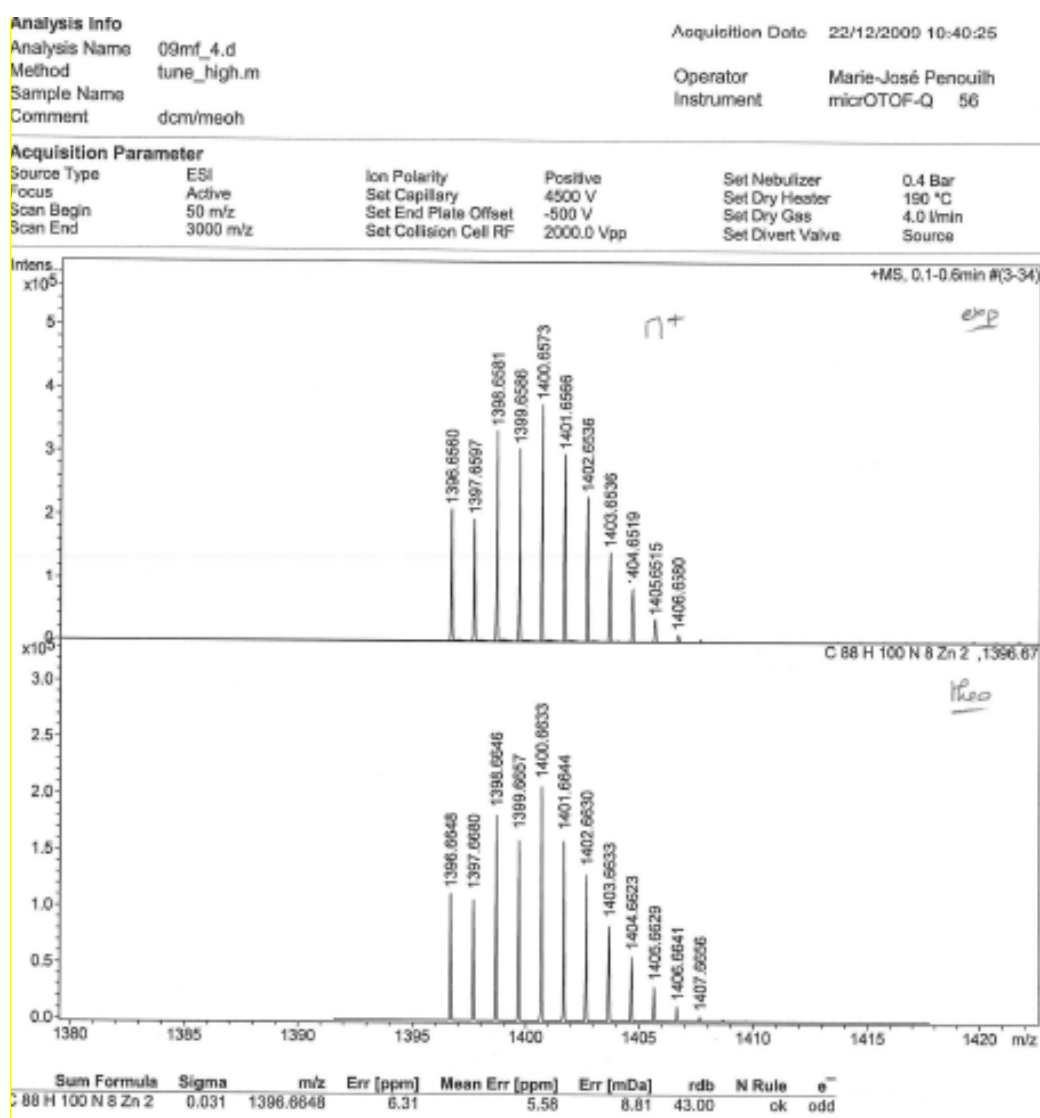

Figure S6. ESI HRMS spectrum of 4 (positive mode).

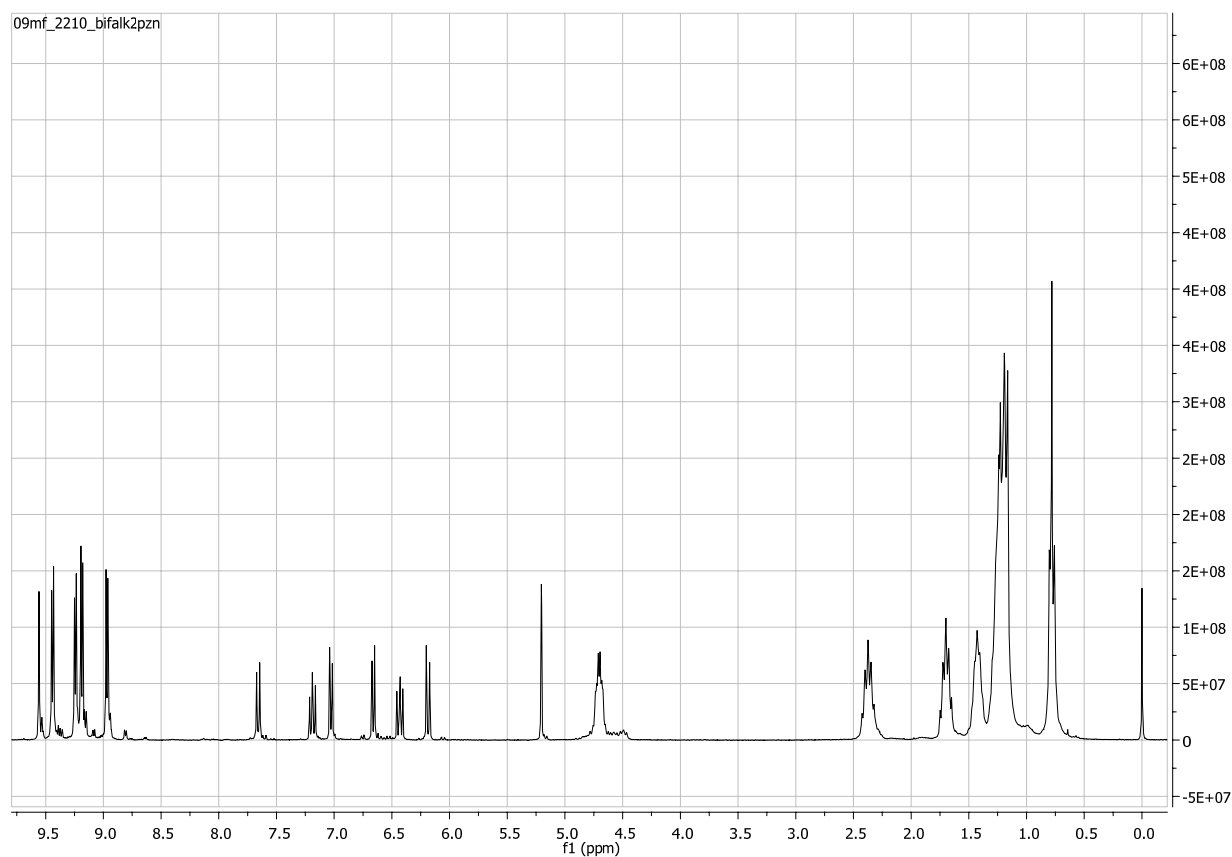

Figure S7.  $^1\text{H}$  NMR spectrum of **5** (300 MHz,  $\text{CD}_2\text{Cl}_2$ , 298 K).

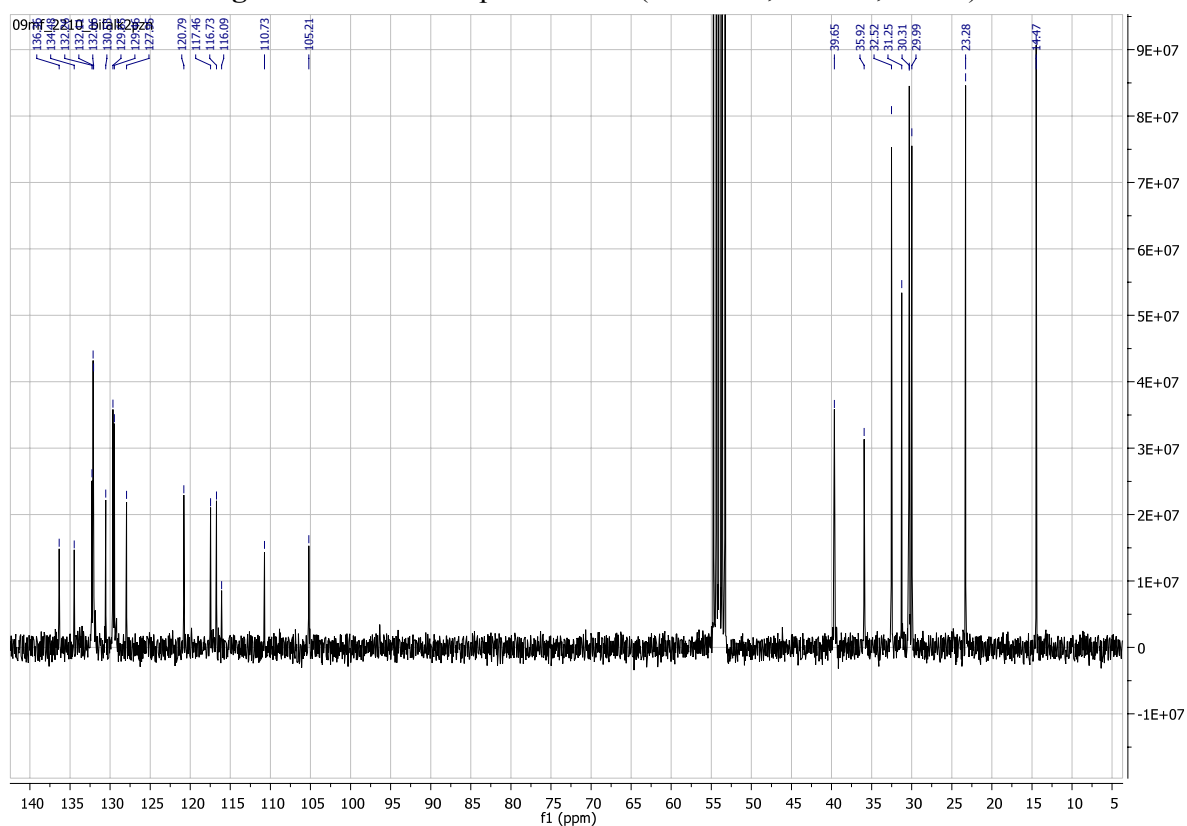

Figure S8.  $^{13}\text{C}$  NMR spectrum of **5** (300 MHz,  $\text{CD}_2\text{Cl}_2$ , 298 K).

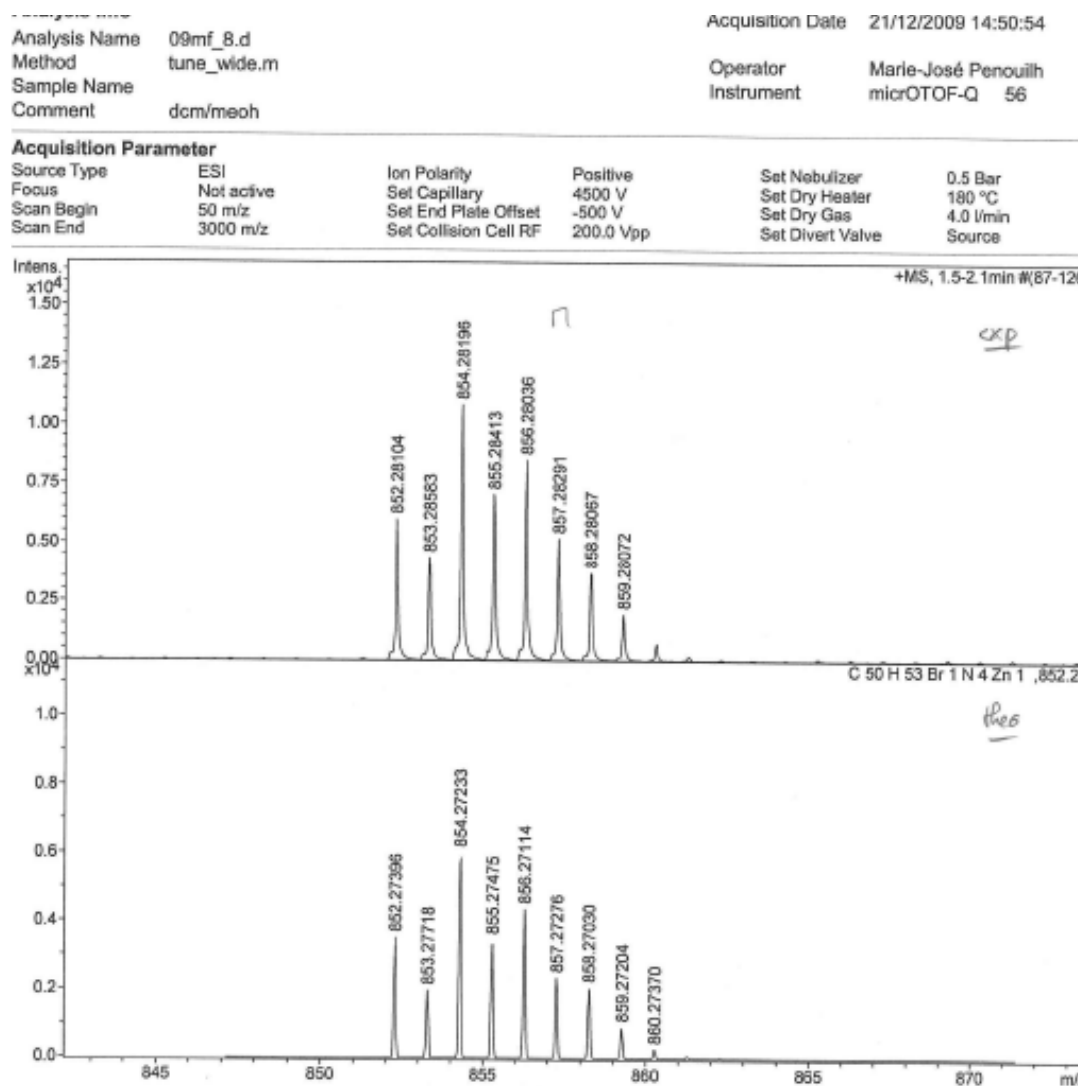

Figure S9. ESI HRMS spectrum of **5** (positive mode).

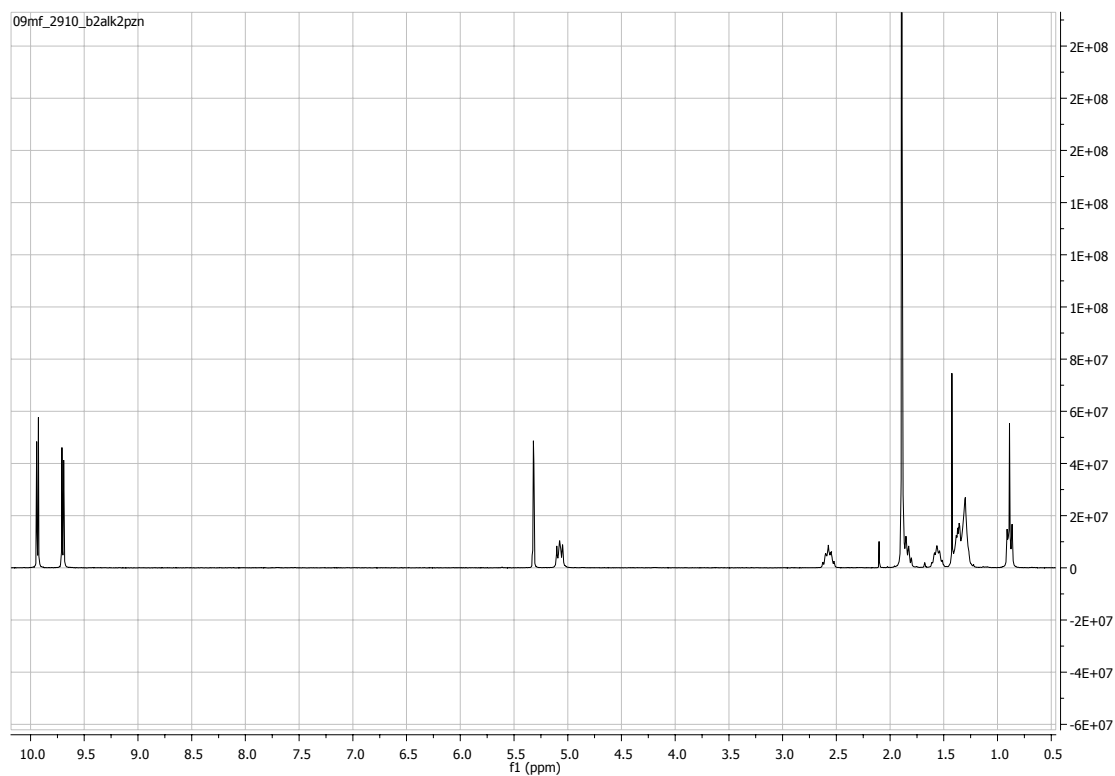

Figure S10.  $^1\text{H}$  NMR spectrum of **6** (300 MHz,  $\text{CD}_2\text{Cl}_2$ , 298 K).

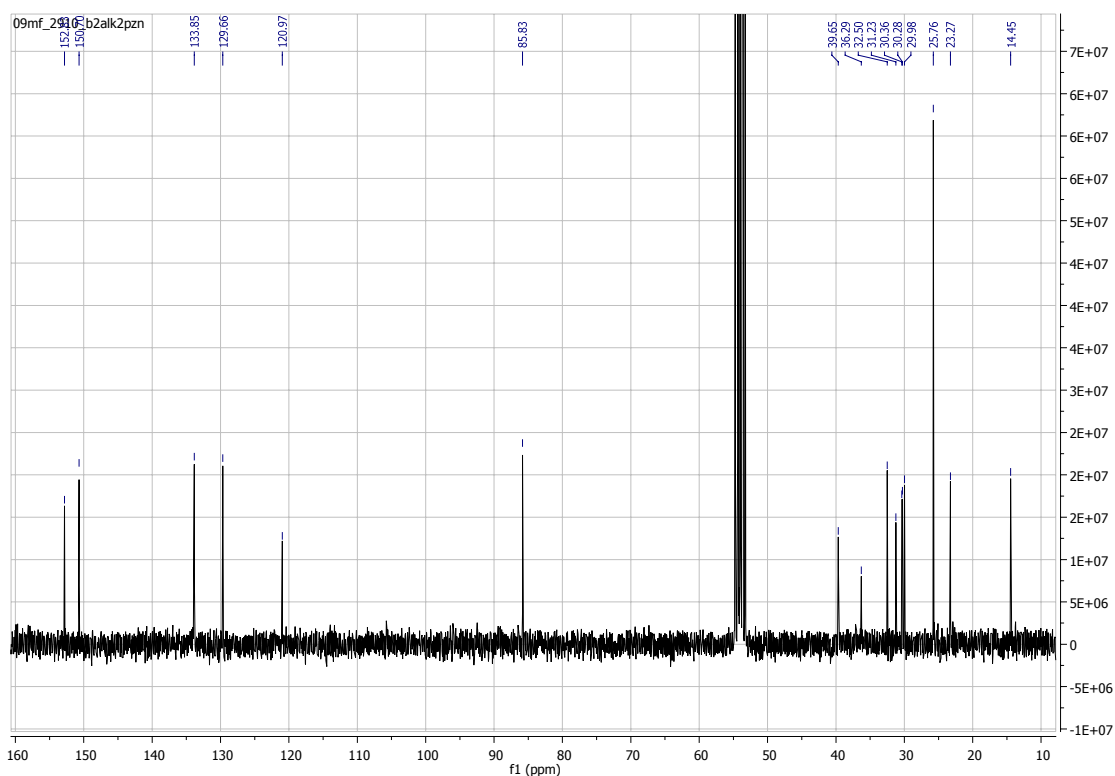

Figure S11.  $^{13}\text{C}$  NMR spectrum of **6** (300 MHz,  $\text{CD}_2\text{Cl}_2$ , 298 K).

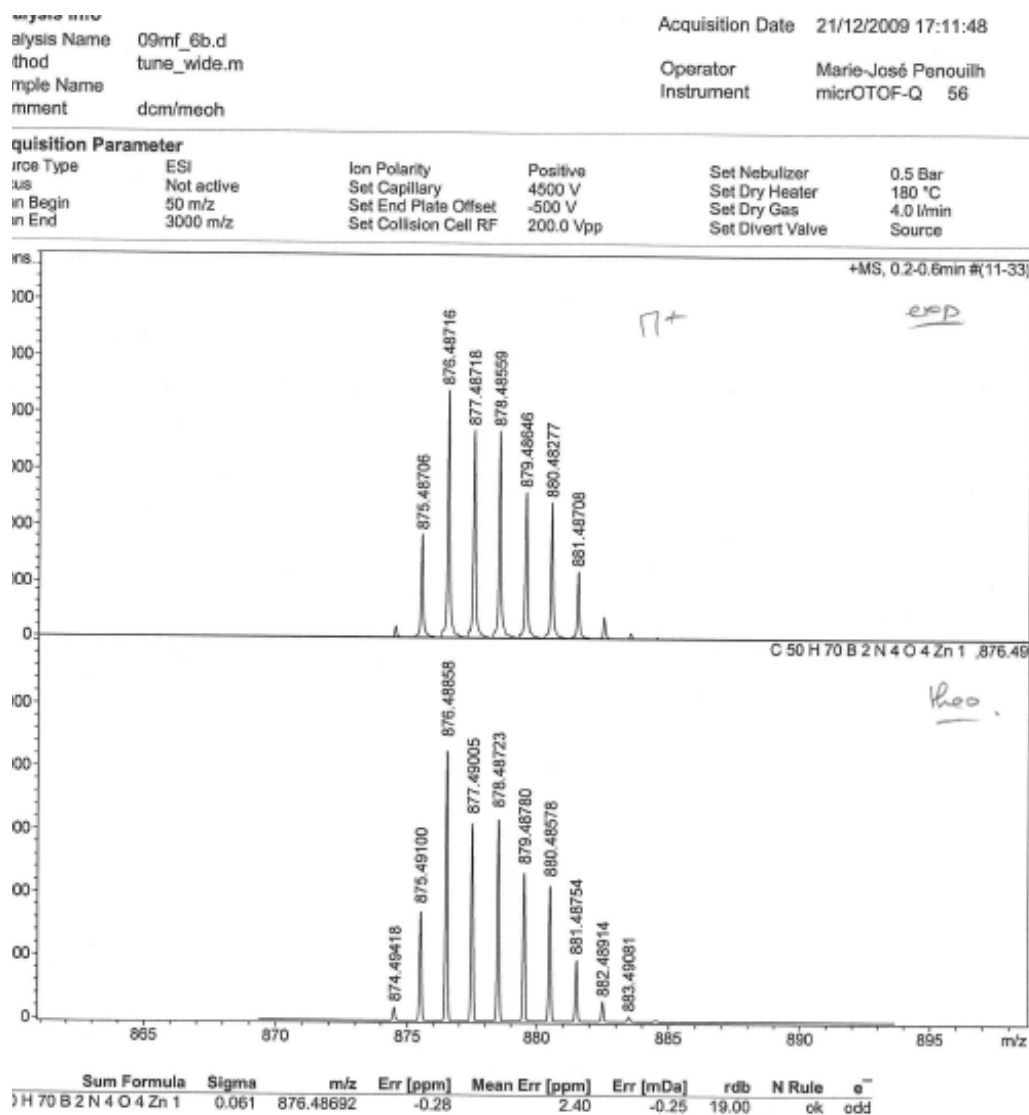

Figure S12. ESI HRMS spectrum of **6** (positive mode).

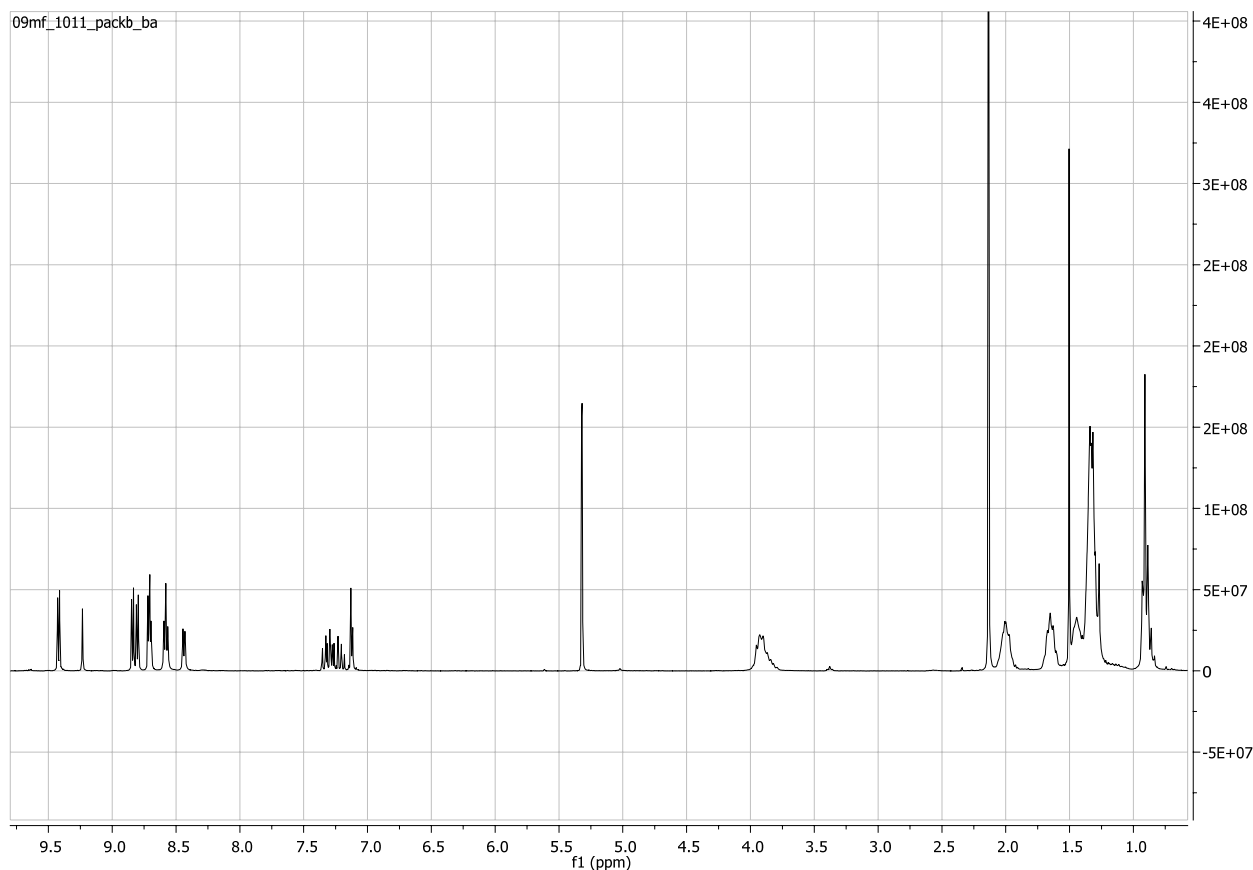

Figure S13.  $^1\text{H}$  NMR spectrum of **7** (300 MHz,  $\text{CD}_2\text{Cl}_2$ , 298 K).

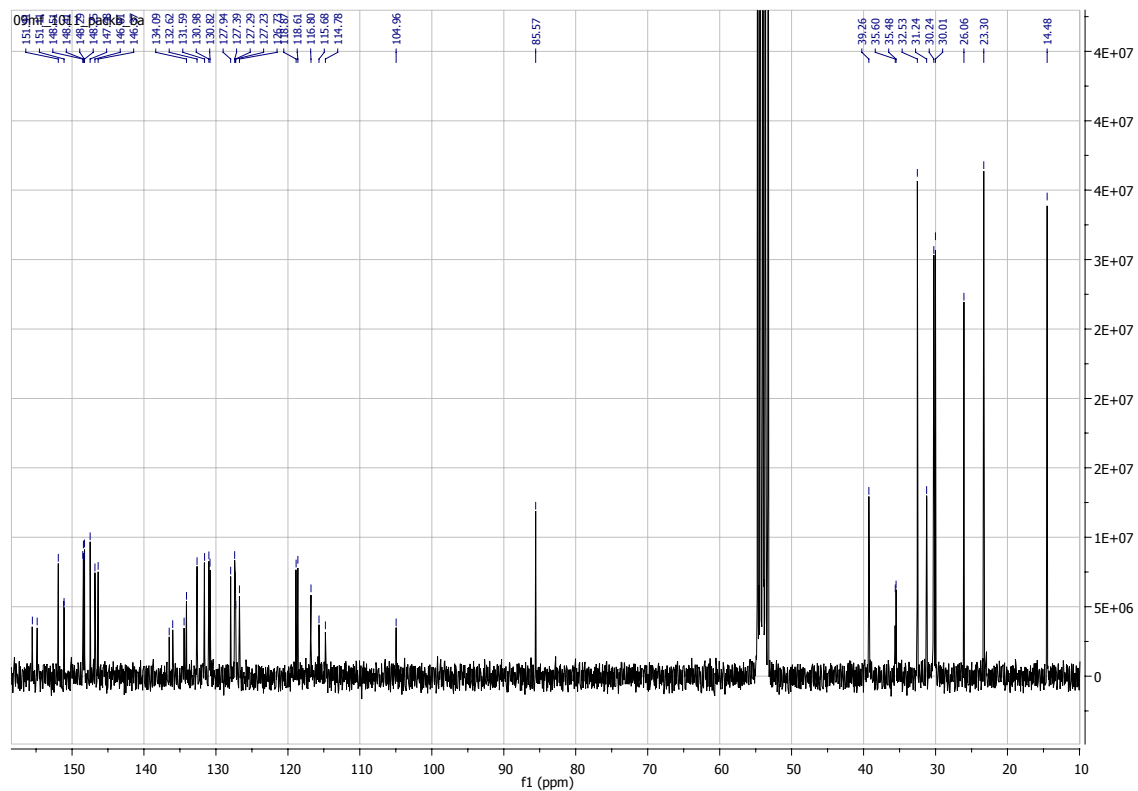

Figure S14.  $^{13}\text{C}$  NMR spectrum of **7** (300 MHz,  $\text{CD}_2\text{Cl}_2$ , 298 K).

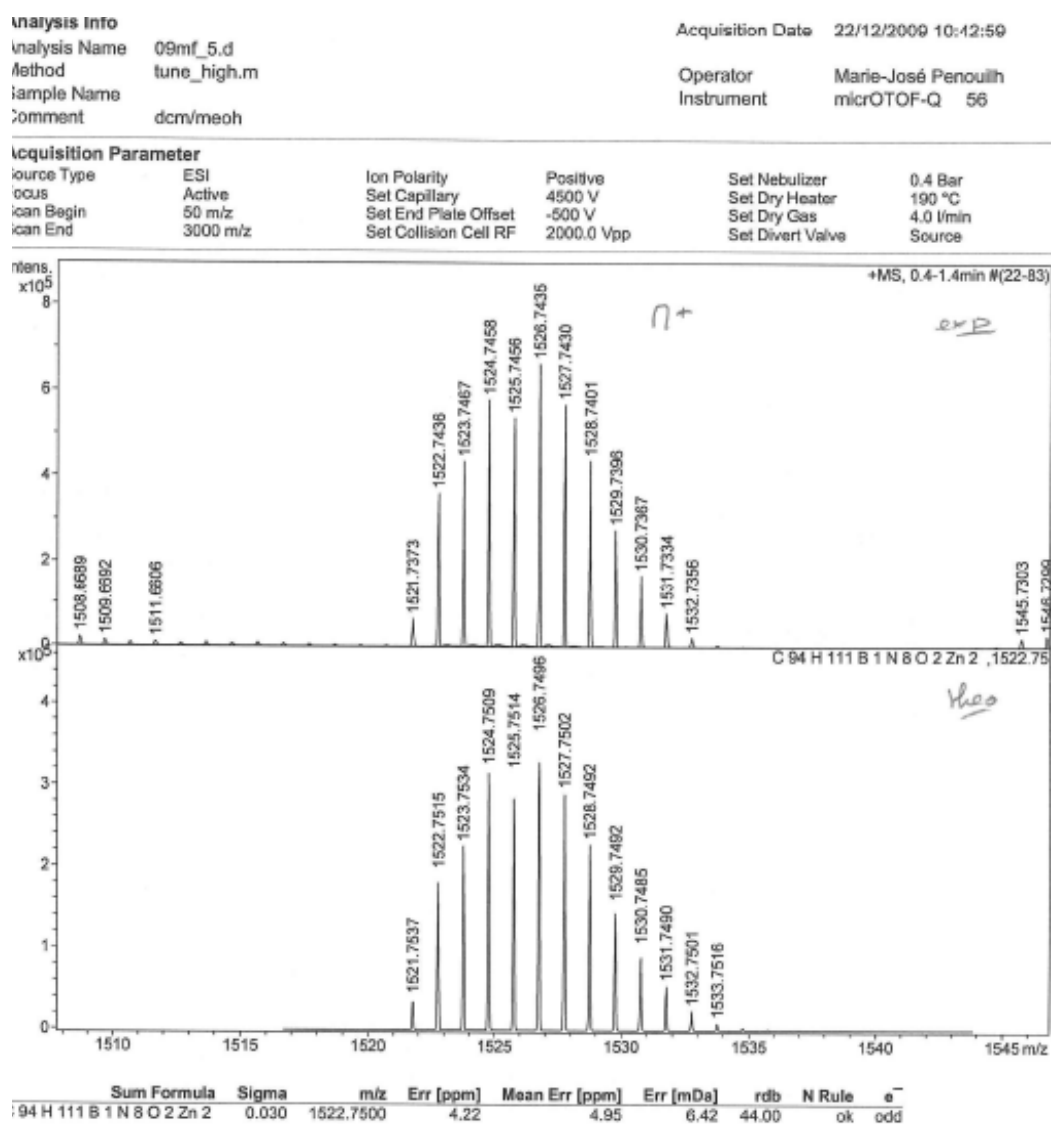

Figure S15. ESI HRMS spectrum of 7 (positive mode).



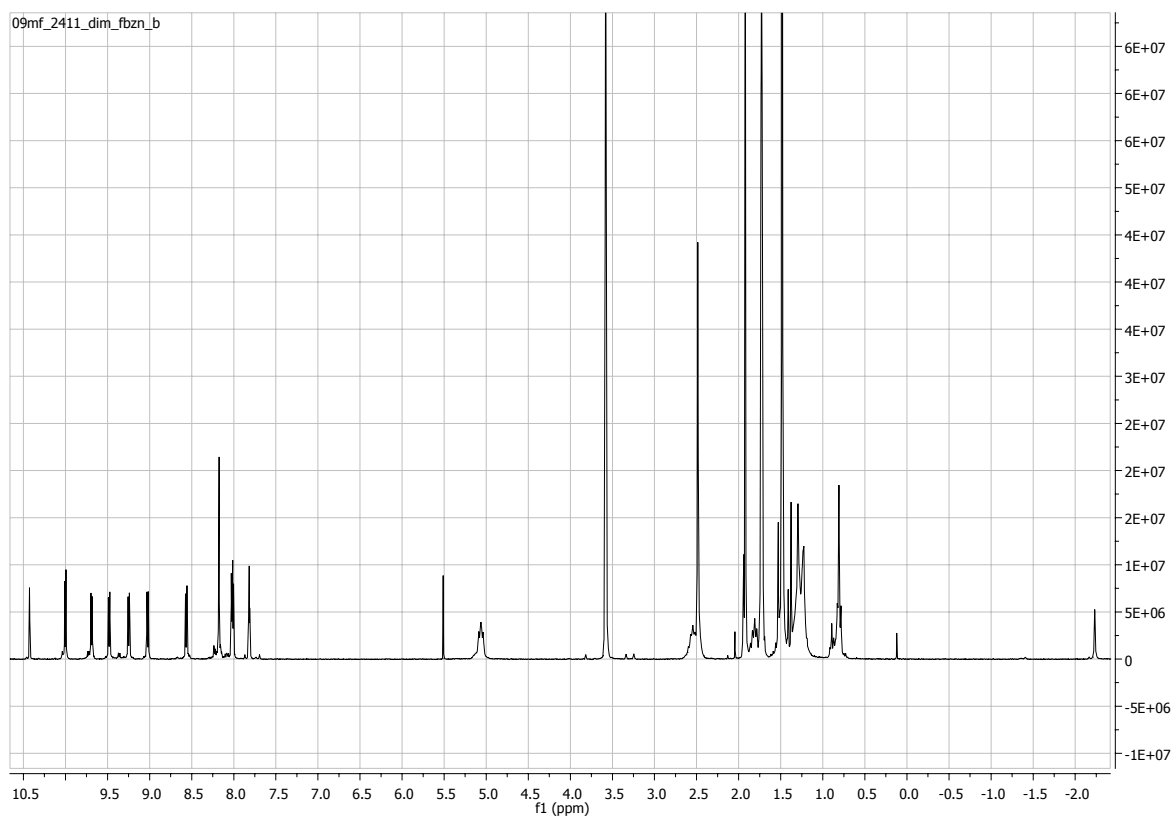

Figure S16.  $^1\text{H}$  NMR spectrum of **9** (300 MHz,  $d^8$ -THF, 298 K).

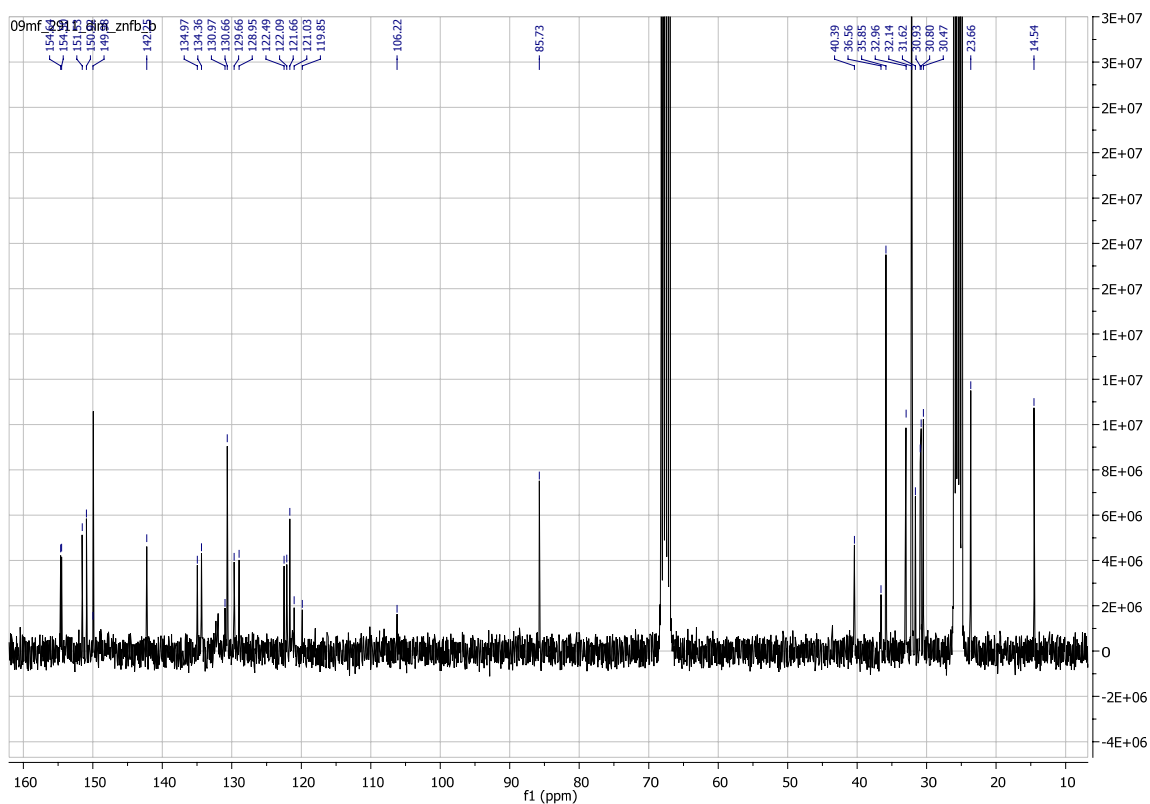

Figure S17.  $^{13}\text{C}$  NMR spectrum of **9** (300 MHz,  $d^8$ -THF, 298 K).

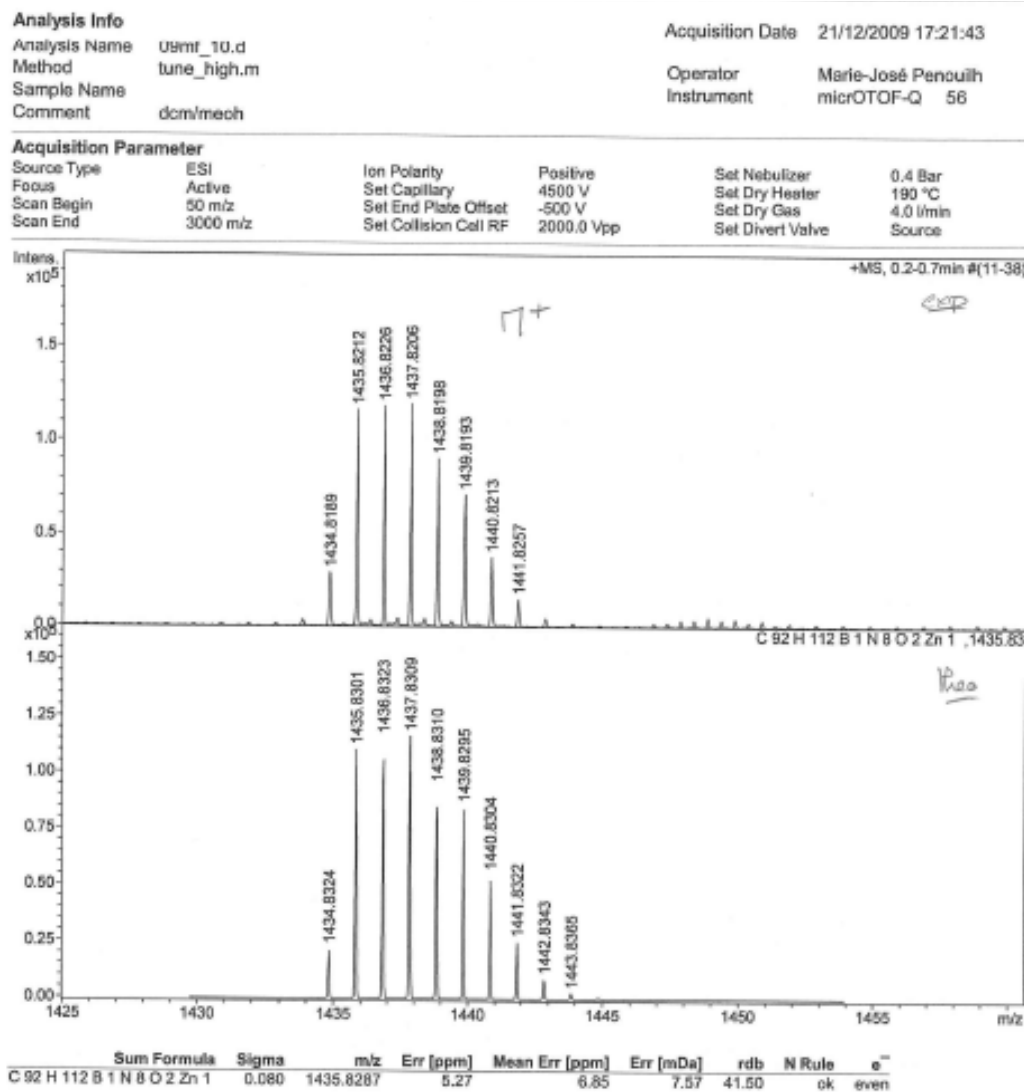

Figure S18. ESI HRMS spectrum of **9** (positive mode).

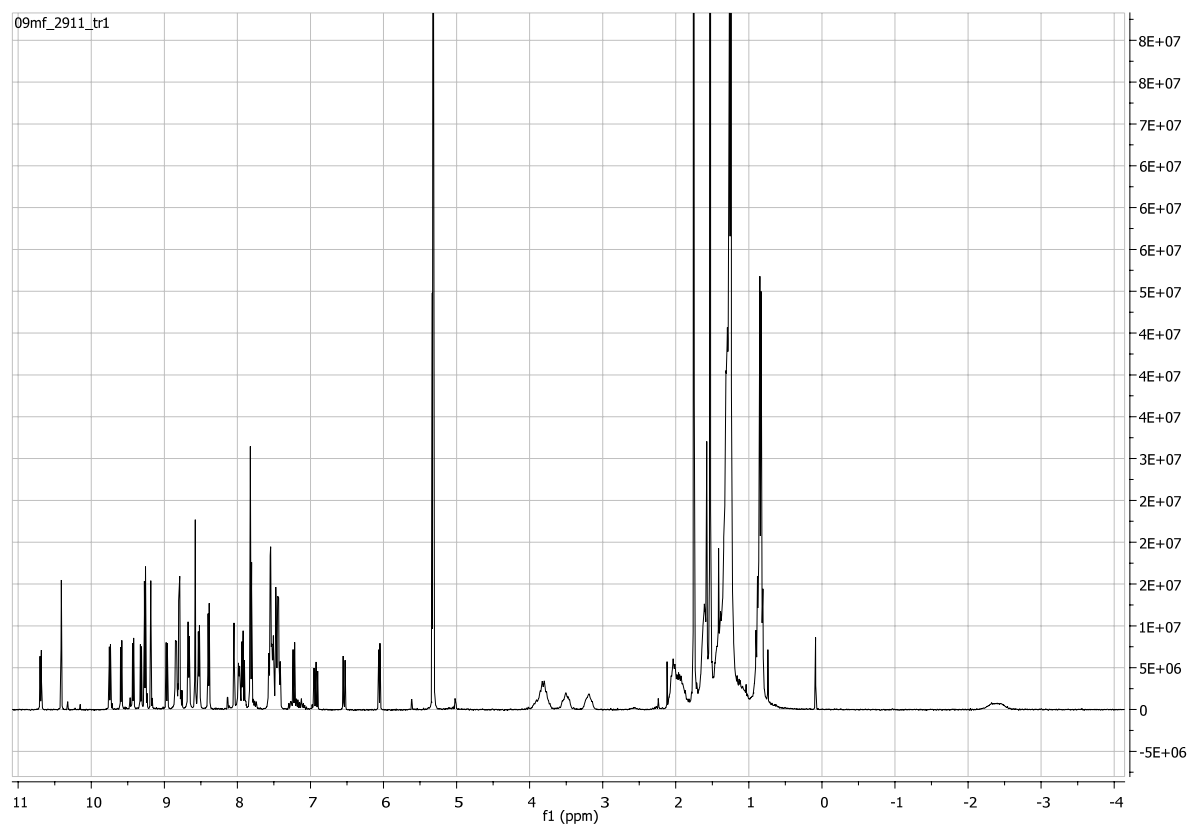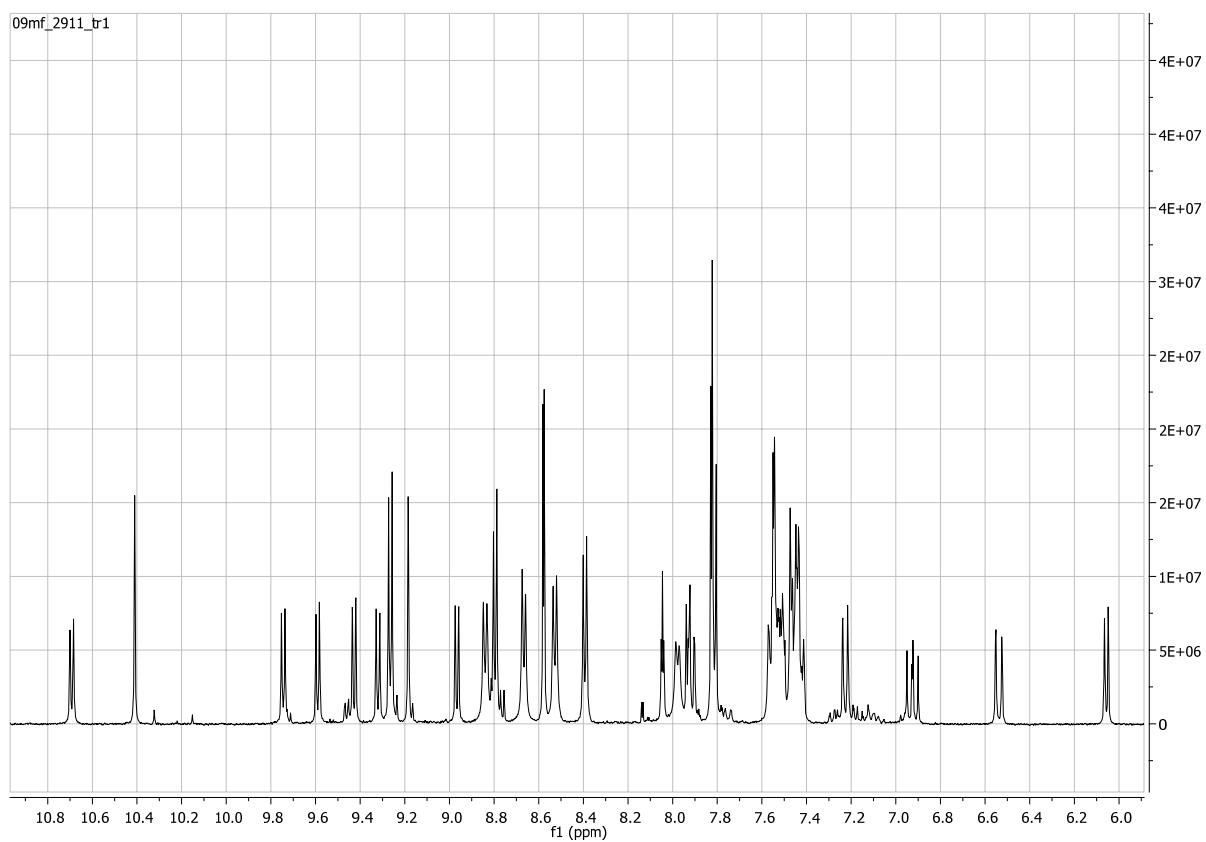

**Figure S19.** <sup>1</sup>H NMR spectrum of **1** (300 MHz, CD<sub>2</sub>Cl<sub>2</sub>, 298 K).

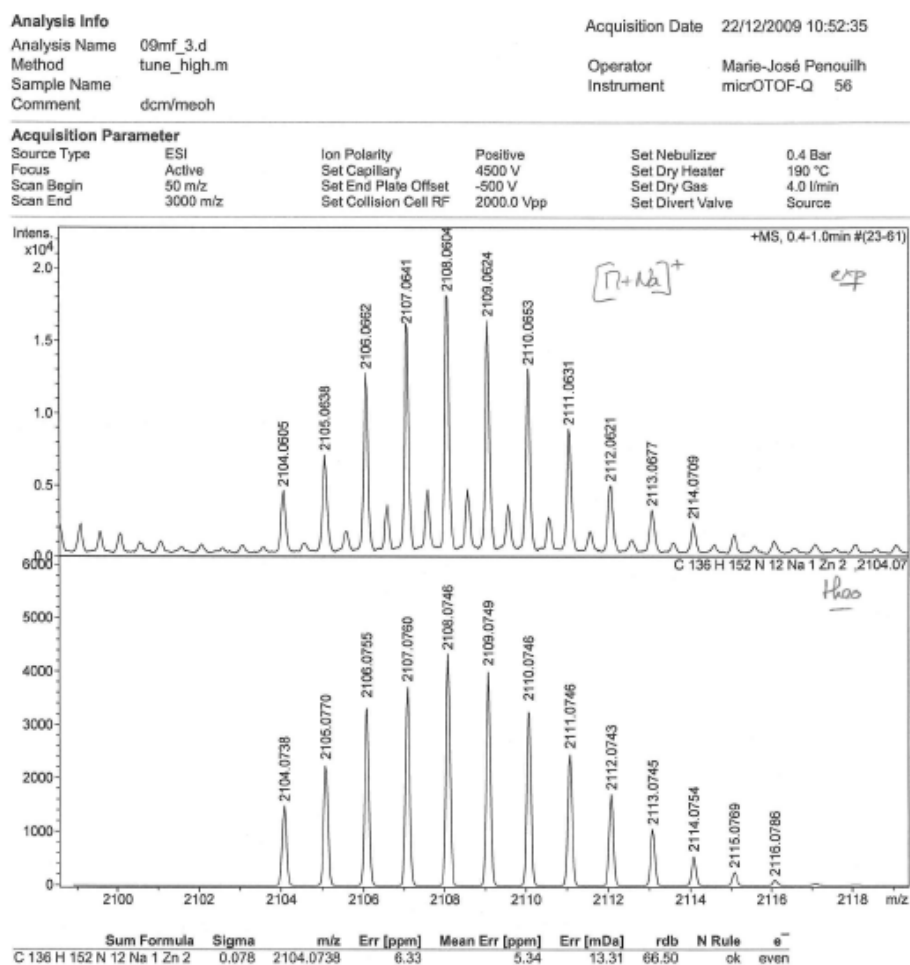

**Figure S20.** ESI HRMS spectrum of **1** (positive mode). Experimentally seen cluster of ions is a combination of  $[M+H]^+$  and  $[M+H]_2^{2+}$  clusters.

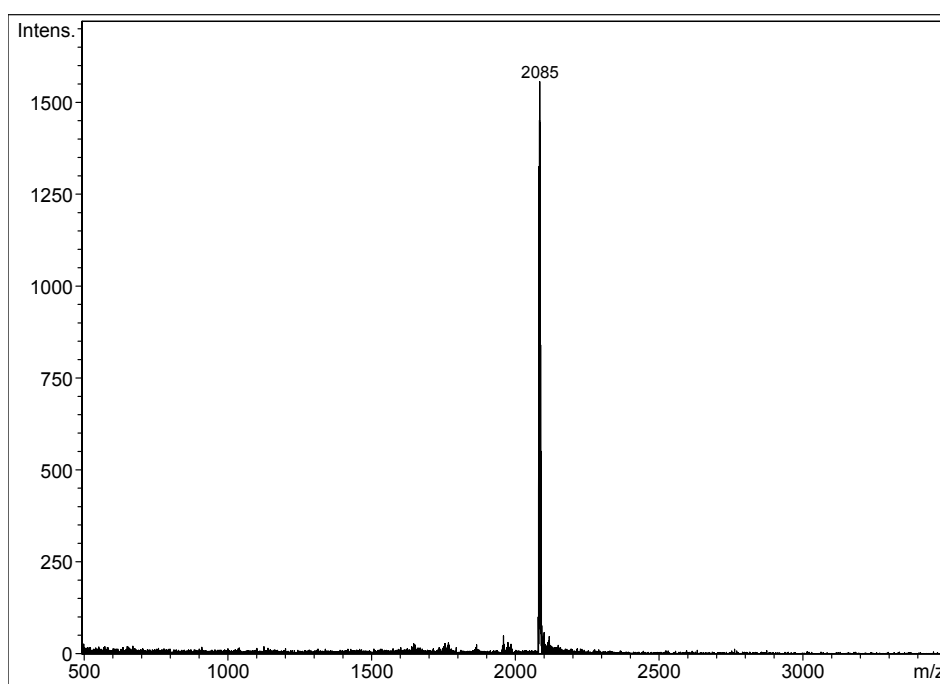

**Figure S21.** MALDI-TOF spectrum of **1** (positive mode).

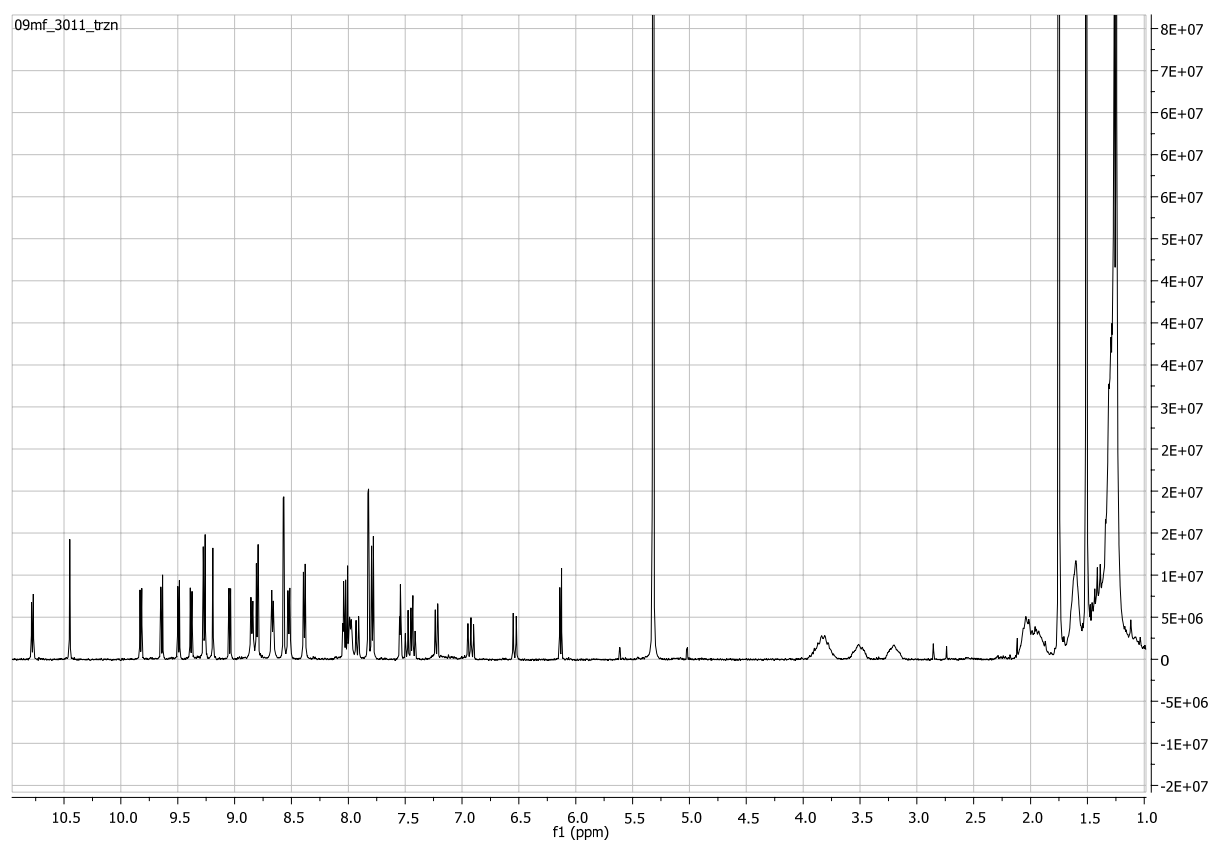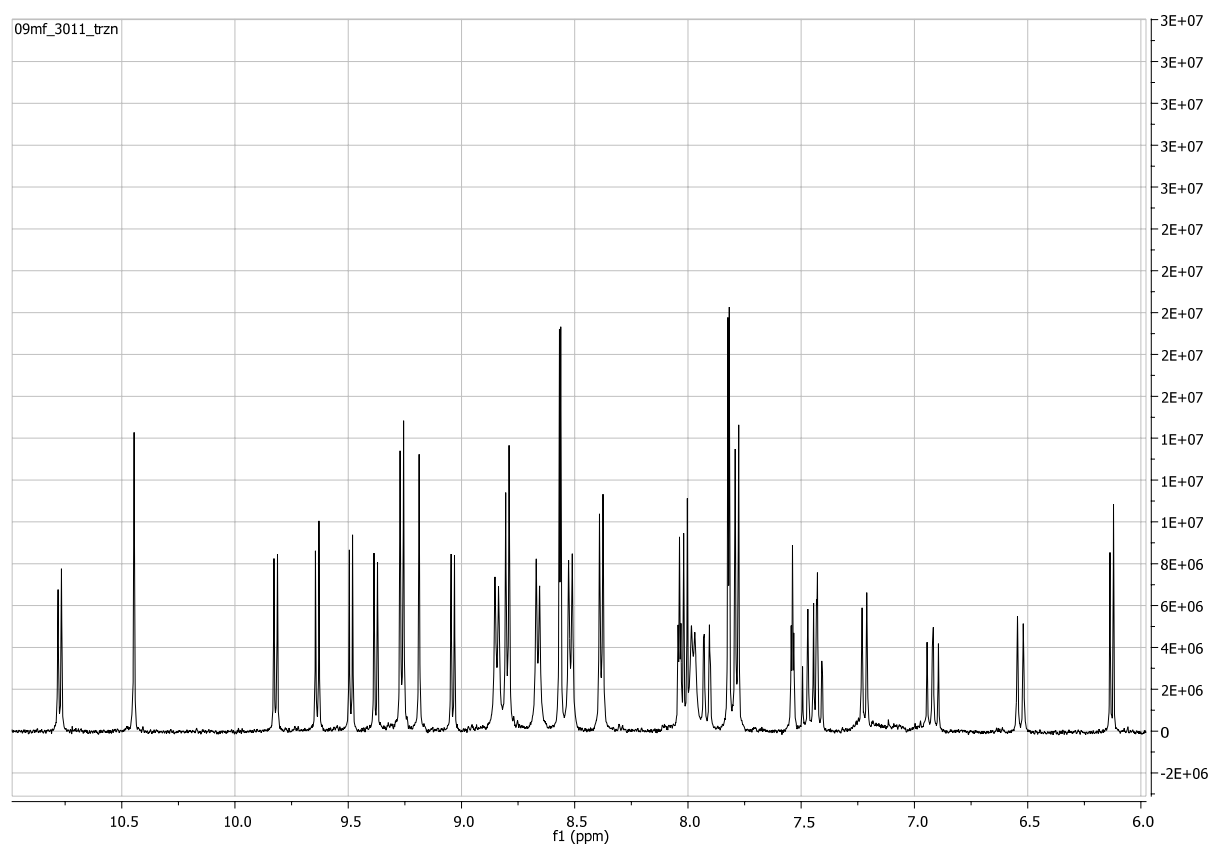

**Figure S22.** <sup>1</sup>H NMR spectrum of **1-Zn** (300 MHz, CD<sub>2</sub>Cl<sub>2</sub>, 298 K).

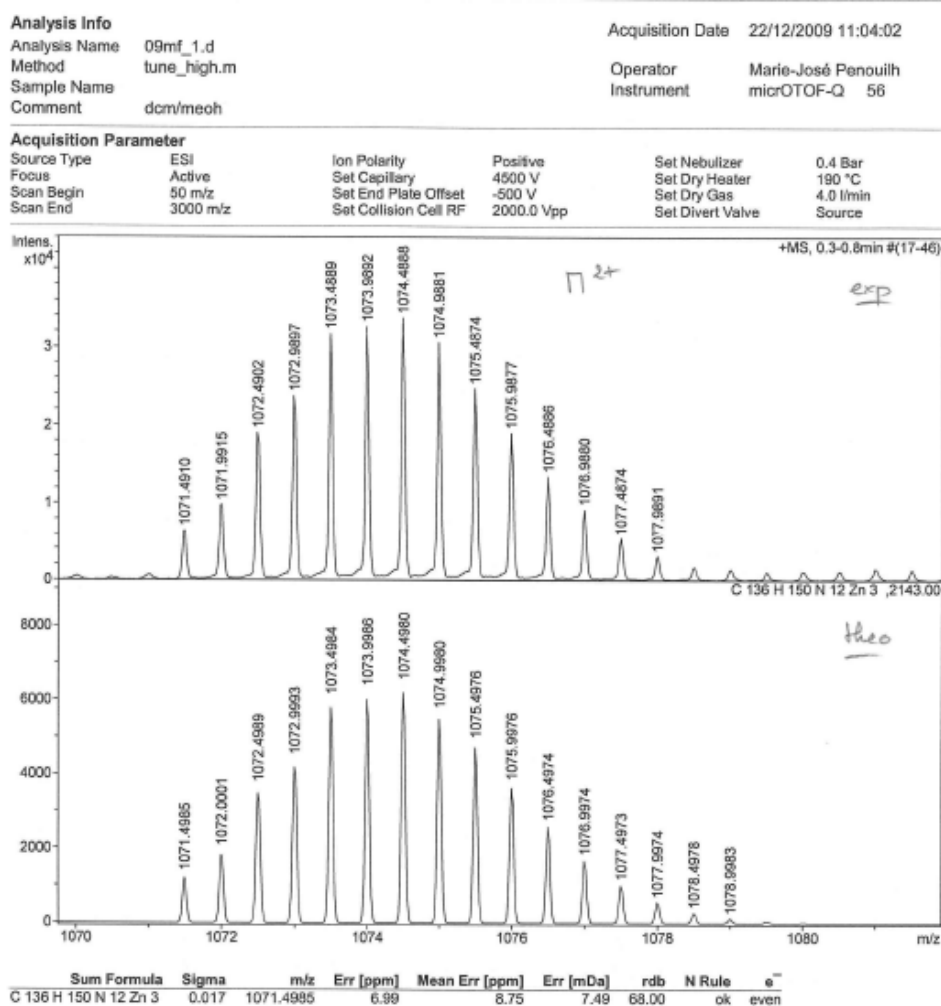

Figure S23. ESI HRMS spectrum of **1-Zn** (positive mode).

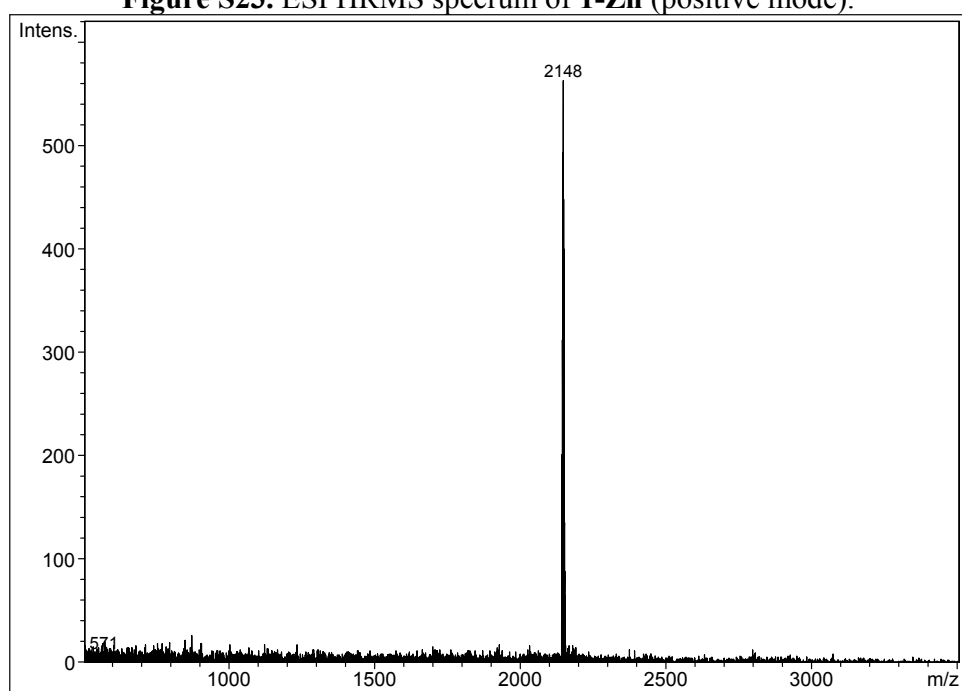

Figure S24. MALDI-TOF spectrum of **1-Zn** (positive mode).

## Optical spectra

| Porphyrin                                                                                        | Absorption                           | Fluorescence                               | $\Phi_F$ | $\tau_F$ , ns |
|--------------------------------------------------------------------------------------------------|--------------------------------------|--------------------------------------------|----------|---------------|
|                                                                                                  | $\lambda_{\max}(\log \epsilon)$ , nm | $\lambda_{\max}(\lambda_{\text{ex}})$ , nm |          |               |
| 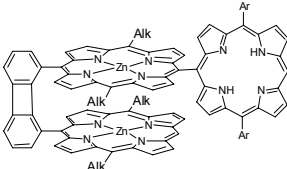<br><b>1</b>    | 414 (5.61)                           | 716 (515)                                  | 0.047    | 2.27          |
|                                                                                                  | 421 (5.60)                           |                                            |          |               |
|                                                                                                  | 514 (4.59)                           |                                            |          |               |
|                                                                                                  | 557 (4.37)                           |                                            |          |               |
|                                                                                                  | 591 (4.32)                           |                                            |          |               |
|                                                                                                  | 648 (3.85)                           |                                            |          |               |
| <br><b>1-Zn</b> | 417 (5.51)                           | 671 (555)                                  | 0.034    | 1.78          |
|                                                                                                  | 556 (4.56)                           |                                            |          |               |
|                                                                                                  | 590 (4.31)                           |                                            |          |               |
|                                                                                                  | 632 (3.88)                           |                                            |          |               |
| <br><b>4</b>    | 406 (5.53)                           | 667 (560)                                  | 0.016    | 1.95          |
|                                                                                                  | 450 (4.28)                           |                                            |          |               |
|                                                                                                  | 560 (4.05)                           |                                            |          |               |
|                                                                                                  | 599 (3.64)                           |                                            |          |               |
| <br><b>5</b>   | 422 (5.43)                           | 603, 648 (550)                             | 0.021    | 2.1           |
|                                                                                                  | 554 (4.10)                           |                                            |          |               |
|                                                                                                  | 598 (3.47)                           |                                            |          |               |
| <br><b>8</b>  | 407 (5.56)                           | 679 (560)                                  | 0.011    | 2.00          |
|                                                                                                  | 561 (4.04)                           |                                            |          |               |
|                                                                                                  | 602 (3.73)                           |                                            |          |               |
| <br><b>9</b>  | 416 (5.64)                           | 661, 716 (560)                             | 0.084    | 5.58          |
|                                                                                                  | 449 (5.45)                           |                                            |          |               |
|                                                                                                  | 513 (4.81)                           |                                            |          |               |
|                                                                                                  | 563 (4.77)                           |                                            |          |               |
|                                                                                                  | 594 (4.42)                           |                                            |          |               |
|                                                                                                  | 609 (4.34)                           |                                            |          |               |
|               | 392 (4.60)                           | 589, 644 (550)                             | 0.035    | 2.89          |
|                                                                                                  | 411 (5.67)                           |                                            |          |               |
|                                                                                                  | 547 (4.15)                           |                                            |          |               |
|               | 407 (5.7)                            | 635, 700 (535)                             | 0.075    | 10.1          |
|                                                                                                  | 502 (4.32)                           |                                            |          |               |
|                                                                                                  | 535 (3.94)                           |                                            |          |               |
|                                                                                                  | 576 (3.79)                           |                                            |          |               |

**Table S1.** Spectroscopic and photophysical data.

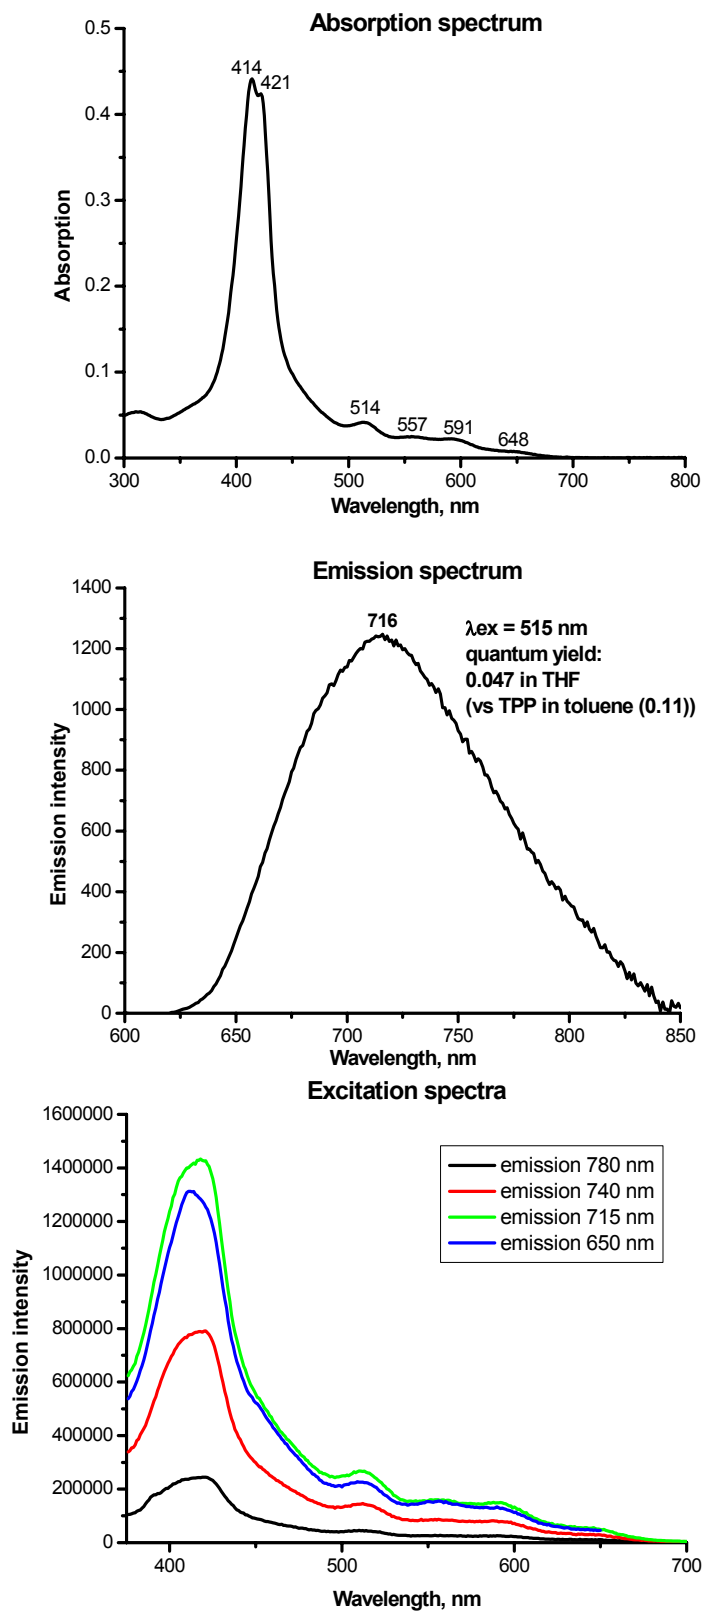

Figure S25. Optical spectra of trimer 1.



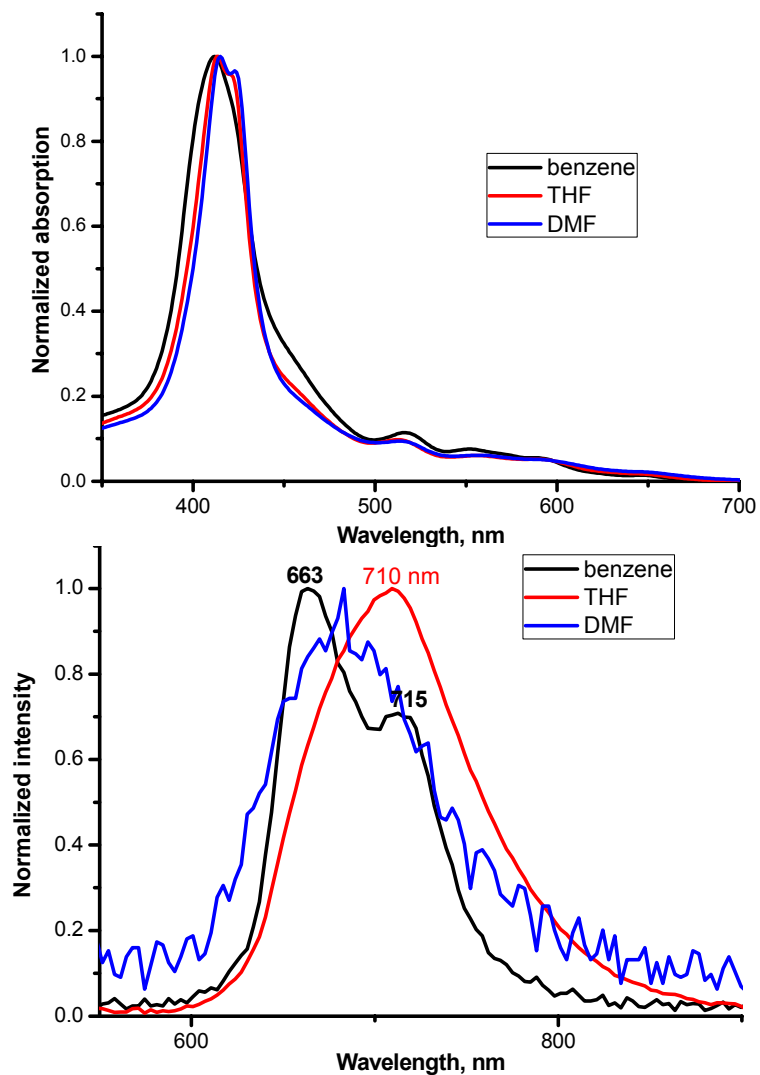

Figure S26. Normalized absorption and emission of trimer 1 in different solvents.

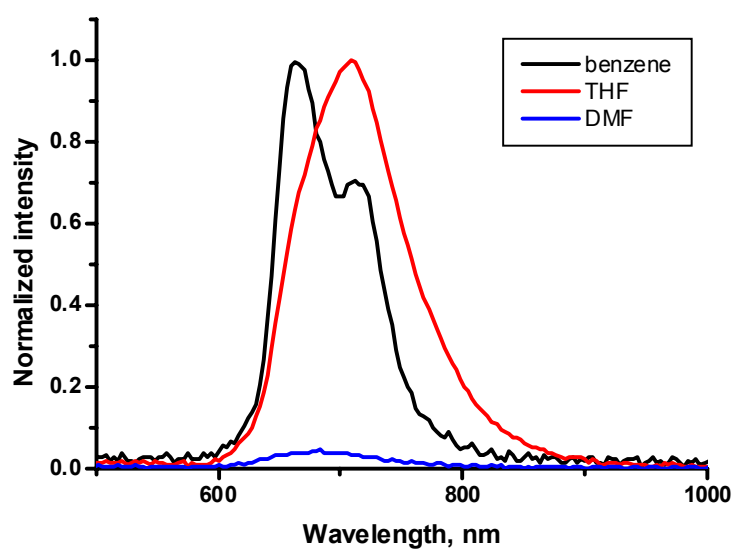

Figure S27. Relative intensities of emission of trimer 1 in different solvents.

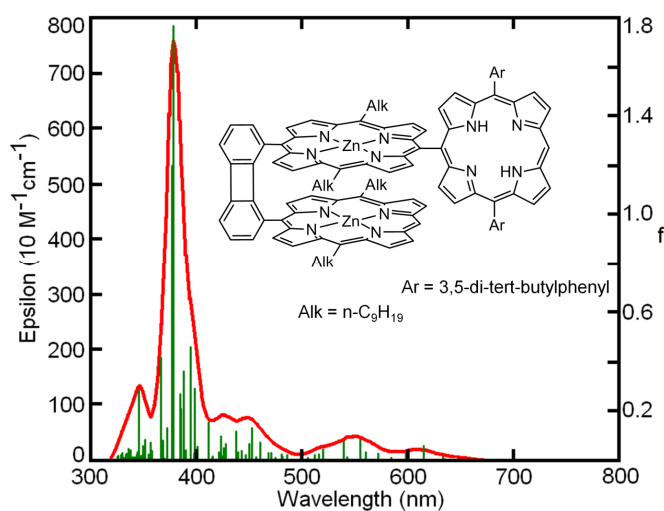

Figure S28. Calculated absorption spectrum of trimer **1**.

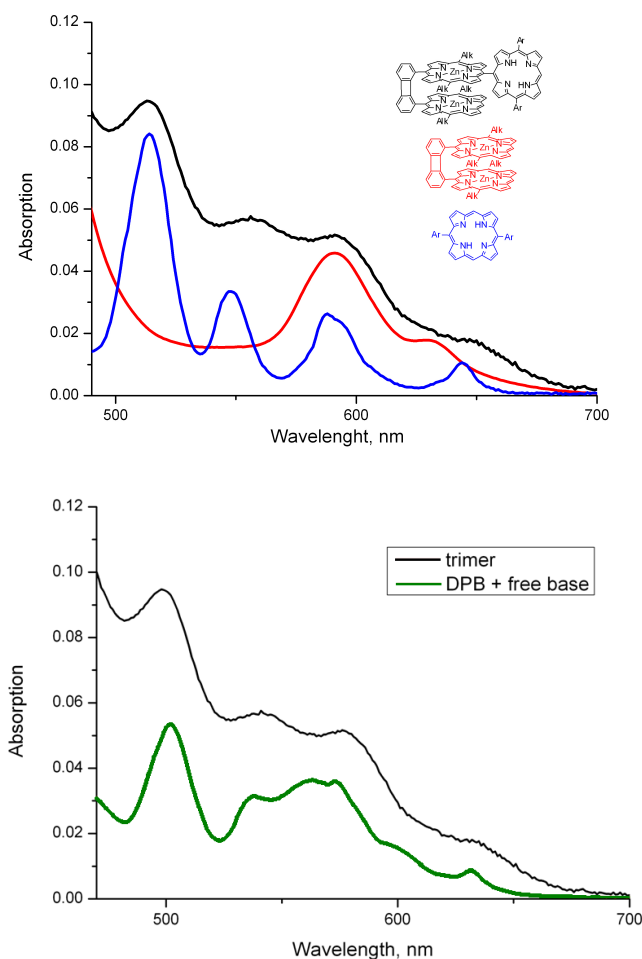

Figure S29. Comparison of the absorption spectra of trimer **1**, dimer **4** and 5,15-bis(3,5-di-tert-butylphenyl)porphyrin free base. The free base spectrum was shifted by 12 nm to the red to match the first band of **1**, the dimer spectrum was shifted by 31 nm to the red. Bottom: comparison of the curve generated by the sum of the blue and red spectra on top (in green) with the experimental spectrum of the trimer **1** (in black).

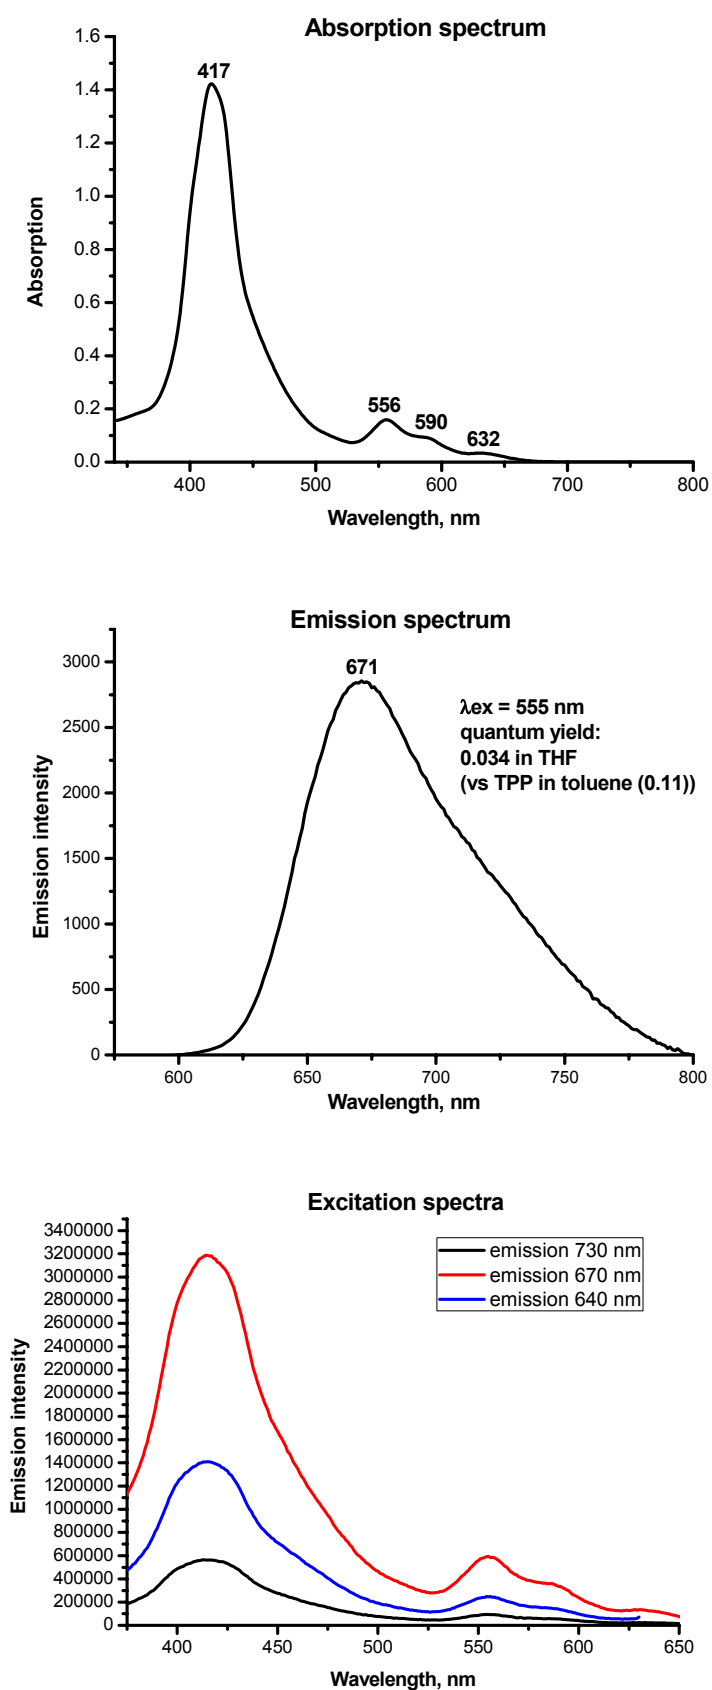

Figure 30. Optical spectra of trimer 1-Zn.

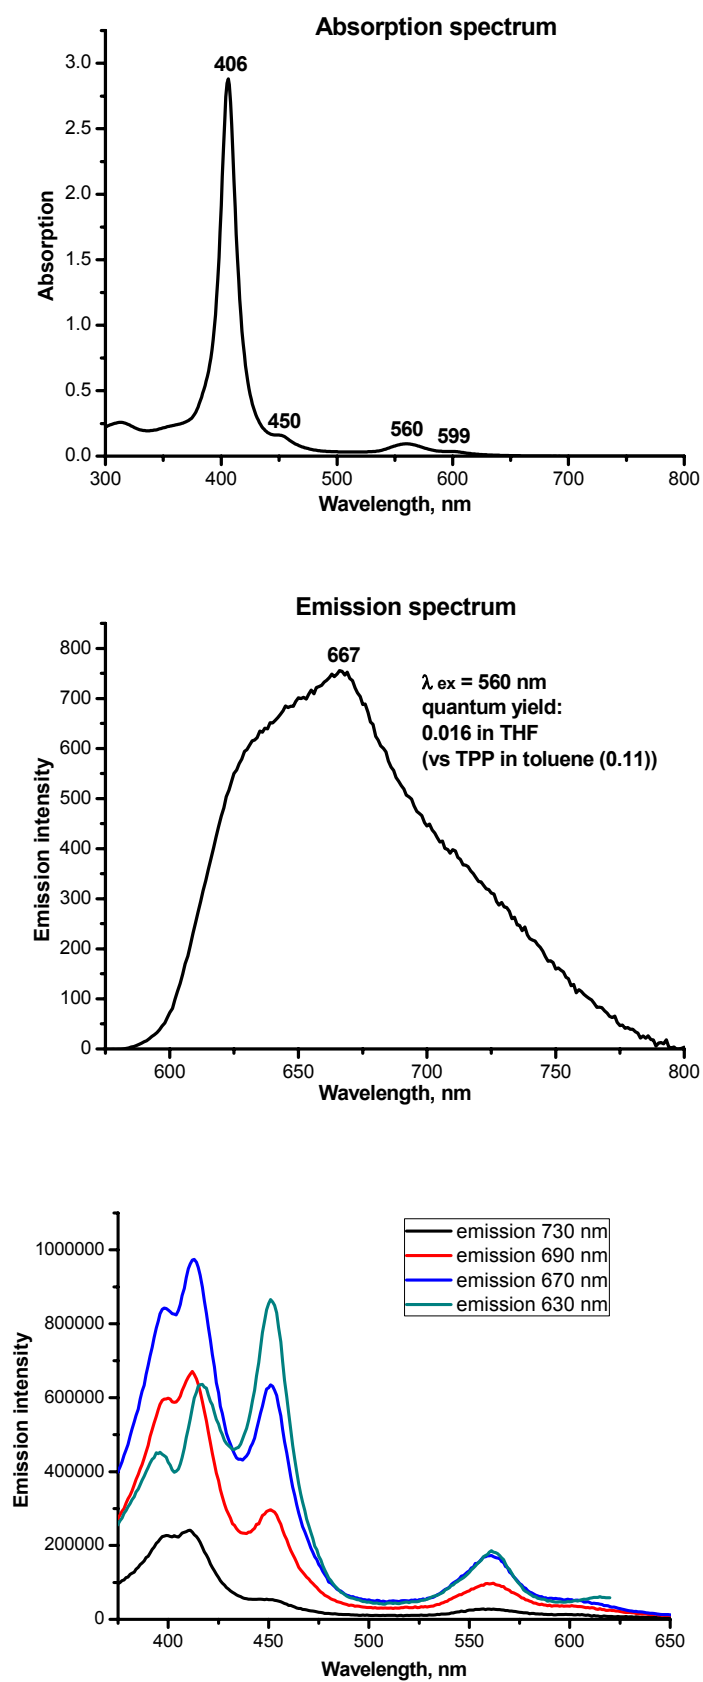

**Figure 31.** Optical spectra of face-to-face dimer 4.

## DFT Calculations

| No. | $\nu$ (cm <sup>-1</sup> ) | $\lambda$ (nm) | f      | Major contributions (%)                                   |
|-----|---------------------------|----------------|--------|-----------------------------------------------------------|
| 1   | 15787.60544               | 633.4082796    | 0.0119 | HOMO→LUMO (48), HOMO→L+2 (-43)                            |
| 2   | 16268.31520               | 614.6918029    | 0.0593 | HOMO→L+1 (59), HOMO→L+3 (-16)                             |
| 3   | 16709.50352               | 598.4618267    | 0.0307 | HOMO→LUMO (32), HOMO→L+1 (13), HOMO→L+2 (37)              |
| 4   | 17108.75072               | 584.4962127    | 0.0090 | H-1→L+1 (-12), HOMO→L+1 (13), HOMO→L+3 (61)               |
| 5   | 17386.20736               | 575.1685686    | 0.0057 | H-1→LUMO (18), H-1→L+2 (-13), HOMO→L+4 (40)               |
| 6   | 17493.47984               | 571.6415540    | 0.0287 | H-1→LUMO (28), HOMO→L+4 (-27)                             |
| 7   | 17861.27120               | 559.8705651    | 0.0321 | H-2→LUMO (-18), H-2→L+1 (-11), H-1→L+2 (23)               |
| 8   | 18007.25856               | 555.3316162    | 0.0902 | H-1→L+1 (39), HOMO→L+5 (-12)                              |
| 9   | 18416.99104               | 542.9768619    | 0.0124 | H-1→LUMO (13), H-1→L+1 (24), H-1→L+3 (26), HOMO→L+5 (12)  |
| 10  | 18544.42752               | 539.2455491    | 0.0923 | H-2→LUMO (10), H-1→LUMO (12), H-1→L+2 (25), H-1→L+4 (-10) |
| 11  | 18782.36272               | 532.4143799    | 0.0024 | H-1→L+4 (63)                                              |
| 12  | 19217.09856               | 520.3699179    | 0.0466 | H-3→L+3 (10), H-1→L+3 (26), HOMO→L+5 (-26)                |
| 13  | 19358.24656               | 516.5757120    | 0.0243 | H-2→LUMO (-14), H-2→L+1 (39)                              |
| 14  | 19522.78480               | 512.2220064    | 0.0196 | H-3→L+2 (21), H-1→L+5 (11)                                |
| 15  | 19764.75280               | 505.9511799    | 0.0081 | H-7→L+3 (-14), H-6→LUMO (-12), H-6→L+2 (29)               |
| 16  | 19953.48784               | 501.1655145    | 0.0048 | H-2→L+2 (42), H-2→L+3 (23)                                |
| 17  | 20130.93104               | 496.7480133    | 0.0009 | H-7→L+2 (-14), H-1→L+5 (23)                               |
| 18  | 20597.12272               | 485.5047055    | 0.0195 | H-6→L+3 (-12), H-3→LUMO (30)                              |
| 19  | 20754.40192               | 481.8254960    | 0.0065 | H-2→L+2 (-12), H-2→L+3 (44)                               |
| 20  | 20770.53312               | 481.4512917    | 0.0233 | H-6→L+2 (-11), H-4→L+2 (12)                               |
| 21  | 21039.92416               | 475.2868843    | 0.0043 | H-6→L+4 (11), H-4→L+3 (-13), H-3→L+4 (13)                 |
| 22  | 21045.57008               | 475.1593785    | 0.0067 | H-7→L+4 (-11), H-5→L+4 (-14), H-3→L+2 (16)                |
| 23  | 21224.62640               | 471.1508138    | 0.0293 | H-3→LUMO (18), H-3→L+1 (-11), H-3→L+2 (10)                |
| 24  | 21357.70880               | 468.2150175    | 0.0290 | H-3→L+1 (45), H-3→L+3 (20)                                |
| 25  | 21732.75920               | 460.1348549    | 0.0745 | H-6→L+4 (17), H-3→L+4 (-14)                               |
| 26  | 21894.07120               | 456.7446551    | 0.0105 | H-2→L+4 (57), H-2→L+5 (15)                                |
| 27  | 22081.19312               | 452.8740791    | 0.1301 | H-5→LUMO (12), H-4→LUMO (16)                              |
| 28  | 22167.49504               | 451.1109614    | 0.0678 | H-7→L+3 (13), H-6→L+3 (13)                                |
| 29  | 22400.59088               | 446.4167956    | 0.0212 | H-4→L+1 (36), H-4→L+3 (11)                                |
| 30  | 22561.09632               | 443.2408717    | 0.0387 | H-4→L+2 (15)                                              |

**Table S2.** Calculated positions, oscillator strengths (f), and major contributions of the 30 first electronic transitions of 1.

## Transient absorption spectra

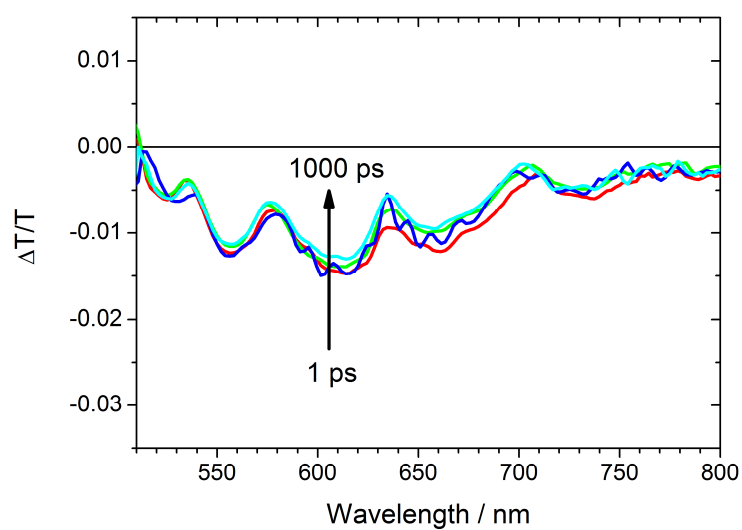

**Figure 32:** TA spectra of **12** (free-base porphyrin) in solution after 1 ps, 10 ps, 100 ps and 1000 ps. Note that there is virtually no decay of the signal on this time scale.

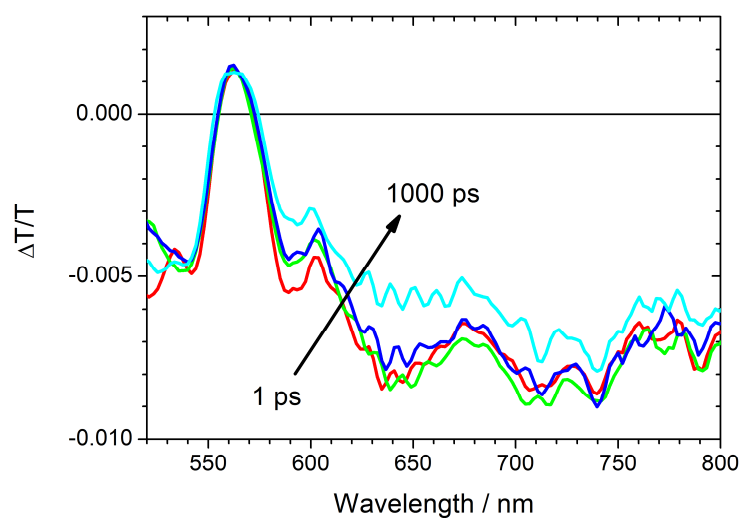

**Figure 33:** TA spectra of compound **4** at 1 ps, 10 ps, 100 ps and 1000 ps delay time after excitation at 400 nm.

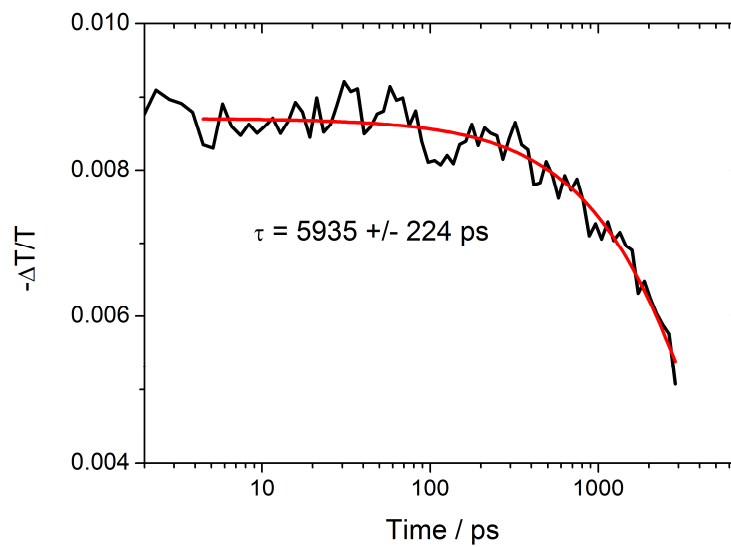

**Figure 34:** Decay of the photoinduced absorption of compound **4** integrated between 700 – 750 nm and fit to a single exponential decay yielding a life time of ~5.9 ns.

## References

---

- (1) Rajca, A.; Safronov, A.; Rajca, S.; Ross, C. R., II.; Stezowski, J. J. *J. Am. Chem. Soc.* **1996**, *118*, 7272.
- (2) Humayun Kabir, S.M.; Iyoda, M. *Synthesis* **2000**, 1839-1842.
- (3) *Organic Syntheses*, **1955**, *3*, 262; **1944**, *24*, 47.
- (4) Bolton, R.; Sandall, J.P.B. *J. Chem. Soc., Perkin Trans. 2.* **1977**, 278.
- (5) Nakamura, Y.; Jang, S.Y.; Tanaka, T.; Aratani, N.; Lim, J.M.; Kim, K.S.; Kim, D.; Osuka, A. *Chem. Eur. J.* **2008**, *27*, 8279.
- (6) Plater, M. J.; Aiken, S.; Bourhill, G. *Tetrahedron* **2002**, *58*, 2405-2413.
- (7) Balaban, T.S.; Goddard, R.; Linke-Schaetzl, M.; Lehn J.-M. *J. Am. Chem. Soc.* **2003**, *125*, 4233-4239.
- (8) Maeda, C.; Shinokubo, H.; Osuka, A. *Org. Lett.* **2007**, *9*, 2493-2496.
- (9) P. G. Seybold, M. Gouterman, *J. Mol. Spectros.* **1969**, *31*, 1.
- (10) (a) Gaussian, Inc., 340 Quinipiac St. Bldg. 40, Wallingford, CT 06492 USA; (b) P. Hohenberg, W. Kohn, *Phys. Rev.* 1964, *136*, B864-B871; (c) W. Kohn, L. Sham, *L. J. Phys. Rev.* 1965, *140*, A1133-A1138; (d) *The Challenge of d and f Electrons*, Eds. D. R. Salahub, M. C. Zerner, ACS, Washington, D.C., 1989; (e) R. G. Parr, W. Yang, *Density-functional theory of atoms and molecules*, Oxford Univ. Press, Oxford, 1989; (f) A. D. Becke *J. Chem. Phys.* 1993, *98*, 5648-5652; (g) C. Lee, W. Yang, R. G. Parr, *Phys. Rev. B: Condens. Matter Mater. Phys.* 1988, *785-789*; (h) B. Miehlich, A. Savin, H. Stoll, H. Preuss, *Chem. Phys. Lett.* 1989, *157*, 200-206; (i) J. S. Binkley, J. A. Pople, W. J. Hehre, *W. J. J. Am. Chem. Soc.* 1980, *102*, 939-947; (j) M. S. Gordon, J. S. Binkley, J. A. Pople, W. J. Pietro, W. J. Hehre, *J. Am. Chem. Soc.* 1982, *104*, 2797-2803; (k) W. J. Pietro, M. M. Francl, W. J. Hehre, D. J. Defrees, J. A. Pople, J. S. Binkley, *J. Am. Chem. Soc.* 1982, *104*, 5039-5048; (l) K. D. Dobbs, W. J. Hehre, *J. Comp. Chem.* 1986, *7*, 359-378; (m) K. D. Dobbs, W. J. Hehre, *J. Comp. Chem.* 1987, *8*, 861-879; (n) K. D. Dobbs, W. J. Hehre, *J. Comp. Chem.* 1987, *8*, 880-893; (o) K. D. Dobbs, W. J. Hehre, *J. Comp. Chem.* 1987, *8*, 880-893.
- (11) TD-DFT: (a) R. E. Stratmann, G. E. Scuseria, and M. J. Frisch, *J. Chem. Phys.* *109*, 8218 (1998); (b) R. Bauernschmitt and R. Ahlrichs, *Chem. Phys. Lett.* *256*, 454 (1996); (c) M. E. Casida, C. Jamorski, K. C. Casida, and D. R. Salahub, *J. Chem. Phys.* *108*, 4439 (1998).



(12) SCRF model solvent: J. Tomasi, B. Mennucci, and R. Cammi, "Quantum mechanical continuum solvation models", *Chem. Rev.* 2005, 105, 2999-3093.

(13) Gausssum 2.1: N.M. O'Boyle, A.L. Tenderholt and K.M. Langner, *Journal of Computational Chemistry* 29, 839-845, (2008).
